# 1 Reconstitution of surface lipoprotein translocation reveals Slam as an 2 outer membrane translocon in Gram-negative bacteria

3

## 4 Authors:

5 Minh Sang Huynh<sup>1</sup>, Yogesh Hooda<sup>1,2</sup>, Raina Li<sup>1</sup>, Maciej Jagielnicki<sup>1</sup>, Christine Chieh-Lin  
6 Lai<sup>1</sup> and Trevor F Moraes<sup>1</sup>.

## 7 Affiliations:

8 <sup>1</sup>Department of Biochemistry, University of Toronto, Canada

9 <sup>2</sup>MRC Laboratory of Molecular Biology, Cambridge University, UK

10 For correspondence, please contact [trevor.moraes@utoronto.ca](mailto:trevor.moraes@utoronto.ca)

11

## 12 Abstract:

13 Surface lipoproteins (SLPs) are peripherally attached to the outer leaflet of the  
14 outer membrane in many Gram-negative bacteria, playing significant roles in nutrient  
15 acquisition and immune evasion in the host. While the factors that are involved in the  
16 synthesis and delivery of SLPs in the inner membrane are well characterized, the  
17 molecular machineries required for the movement of SLPs to the surface are still not fully  
18 elucidated. In this study, we investigated the translocation of a surface lipoprotein TbpB  
19 through a Slam1-dependent pathway. Using purified components, we developed an *in*  
20 *vitro* translocation assay where unfolded TbpB is transported through Slam1 containing  
21 proteoliposomes, confirming Slam1 as an outer membrane translocon. While looking to  
22 identify factors to increase translocation efficiency, we discovered the periplasmic  
23 chaperone Skp interacted with TbpB in the periplasm of *Escherichia coli*. The presence

24 of Skp was found to increase the translocation efficiency of TbpB in the reconstituted  
25 translocation assays. A knockout of Skp in *Neisseria meningitidis* revealed that Skp is  
26 essential for functional translocation of TbpB to the bacterial surface. Taken together, we  
27 propose a pathway for surface destined lipoproteins, where Skp acts as a holdase for  
28 Slam-mediated TbpB translocation across the outer membrane.

29

## 30 **Introduction:**

31 Transport of proteins to their correct spatio-temporal location is imperative for cell  
32 survival. This key process often requires the movement of proteins across lipid bilayers  
33 through a translocation channel which is also referred to as a translocon (Walter and  
34 Lingappa, 1986; Schnell and Hebert, 2003). Translocons are found in all living organisms  
35 and include the Sec translocon that is responsible for the bulk of protein transport across  
36 the inner plasma membrane (in prokaryotes) and the endoplasmic reticulum membrane  
37 (in eukaryotes) (Johnson and Van Waes, 1999; Tsirigotaki et al, 2017). Many Gram-  
38 negative bacteria contain an additional outer membrane (OM) that is separated from the  
39 plasma membrane (or inner membrane - IM) by a periplasmic space and a peptidoglycan  
40 layer. A number of outer membrane translocons have been previously identified and use  
41 different molecular mechanisms to export proteins to the extracellular matrix (Karupiah  
42 et al, 2011).

43 Surface lipoproteins (SLPs) are peripheral membrane proteins that are anchored to the  
44 surface of Gram-negative bacteria. These proteins play critical roles in bacterial  
45 physiology and virulence (Wilson and Bernstein, 2016). Many SLPs were shown to  
46 improve bacterial fitness and survival in the host environment, especially for pathogenic  
47 bacteria such as *Neisseria*, *Bacteroides* and *Spirochetes* (Hooda and Moraes, 2018).  
48 SLPs contain an N-terminal signal peptide that allows their translocation across the inner

49 membrane by the Sec or Tat machinery. In the periplasmic space, the SLPs are modified  
50 by three biosynthetic enzymes that cleave the signal peptide and add a lipid group to the  
51 N-terminal cysteine residue which anchors them to the inner membrane (Zückert, 2014).  
52 Most of these lipidated SLPs are recognized by the Lol system, which then delivers SLPs  
53 across the periplasm to the inner leaflet of the outer membrane (Szewczyk and Collet,  
54 2016; Okuda and Tokuda, 2011). In the outer membrane, the protein machinery  
55 responsible for the translocation of SLPs across the outer membrane is known only for a  
56 handful of SLPs. Recently, an outer membrane protein named Slam (**S**urface **L**ipoprotein  
57 **a**ssembly **m**odulator) was identified in the human pathogen *Neisseria meningitidis* that is  
58 necessary for the surface display of the SLP transferrin binding protein B or TbpB  
59 (Hooda et al, 2016). Slam-like proteins were subsequently found in several Gram-  
60 negative bacteria from the phylum *Proteobacteria* (Hooda et al, 2017). Co-expression of  
61 Slam1 (the first Slam discovered) with TbpB in the model organism *Escherichia coli*,  
62 which lacks both Slam1 and TbpB genes, allows for functional surface display of TbpB.  
63 Further, Slam1 was found to interact with TbpB in the outer membrane through co-  
64 immunoprecipitation experiments (Hooda et al 2016). Taken together, these results  
65 confirmed that Slam1 plays a critical role in the transport of TbpB across the outer  
66 membrane (Hooda et al 2015). However, the genetic experiments in *N. meningitidis* and  
67 the heterologous expression experiments in *E. coli* did not yield a concrete answer as to  
68 the exact role of Slam during SLP translocation.

69 In this study, we developed an *in vitro* functional assay that allowed us to  
70 investigate the role of Slam1 in TbpB translocation. Such assays have been previously  
71 developed to study the role of outer membrane protein translocons such as the Bam  
72 complex (Hagan et al, 2010; Hagan et al, 2011), the autotransporter EspP (Roman-  
73 Hernandez et al, 2011), the two-partner secretion system (TPSS) protein B (Norell et al,

74 2014; Fan et al, 2012) and the lipopolysaccharide translocon LptD (Sherman et al,  
75 2018). By reconstituting Slam1-mediated TbpB translocation *in vitro*, we confirmed that  
76 Slam1 acts as an autonomous translocon for the movement of TbpB across the  
77 membrane. Furthermore, we discovered that the periplasmic chaperone, Skp, interacts  
78 with TbpB and at least another Slam-dependent SLP, named HpuA in the periplasm. We  
79 also found that the presence of Skp is crucial for the efficient translocation of TbpB to the  
80 surface of *N. meningitidis*. Taken together, we propose a pathway for the localization of  
81 surface lipoproteins from the cytoplasm to the surface of Gram-negative bacteria.

82

## 83 **Results:**

### 84 **Purification and incorporation of Slam1 into liposomes**

85 To evaluate the feasibility of characterizing the role of Slam in SLP translocation,  
86 we first expressed and tested the function of different homologs of Slam to screen for the  
87 most stable Slam-SLP pair for the *in vitro* study. From our analysis, we found that the  
88 Slam1 from *Moraxella catarrhalis* (or Mcat Slam1) expressed well and the purified  
89 protein was more stable than other Slam homologs. In addition, co-expression of Mcat  
90 Slam1 with Mcat TbpB successfully reconstituted the display of TbpB on the surface of  
91 *E. coli* (DE3) cells (Supplementary Fig. 1&2) making Mcat Slam1 a suitable protein for  
92 this study. The results also suggested that the components from *E. coli* are sufficient for  
93 Slam1-dependent TbpB translocation.

94

95 To determine whether Slam1 is an outer membrane translocon working independently  
96 from other major translocation system such as the Bam complex, we attempted to  
97 reconstitute the Slam1-dependent TbpB translocation with minimal components. First,

98 we tested the incorporation of purified Mcat Slam1-DDM complex into liposomes.  
99 Detergent removal allowed for successful insertion of Mcat Slam1 as seen by SDS-  
100 PAGE, and western blot analysis using  $\alpha$ -His antibodies (Supplementary Fig. 3). To  
101 examine liposome insertion, we used the *E. coli* BamABCDE complex as a control.  
102 BamABCDE was purified as previously described (Hagan et al 2011) and could  
103 potentiate the insertion of the outer membrane protein OmpA into liposomes  
104 (Supplementary Fig. 4). Insertion of Mcat Slam1 or Bam complex into liposomes did not  
105 affect the stability of liposomes as proteoliposomes containing these proteins were able  
106 to float to the top of sucrose gradients upon ultracentrifugation (Supplementary Fig. 5a).  
107 Further, to examine the orientation of Mcat Slam1 and Bam complex in proteoliposomes,  
108 we incubated the Mcat Slam1 and BamABCDE containing proteoliposomes with  
109 proteinase K. The addition of proteinase K led to formation of low-molecular weights  
110 bands in an SDS-PAGE gel (marked with asterisk, Supplementary Fig. 5b, left panel)  
111 and loss of Slam1 band in an  $\alpha$ -His western blot (Supplementary Fig. 5b, right panel),  
112 indicating that over 80% of Slam is inserted with its periplasmic domain protruding from  
113 the surface - the “inside-out” orientation required for the *in vitro* translocation assay.

114

### 115 **Slam1 proteoliposomes translocate purified unfolded substrate**

116 Once we established a proteoliposome with Slam1 incorporation, we attempted to detect  
117 the Slam-mediated transport of SLPs across the bilayer (Hagan et al, 2010) (Fig. 1a). To  
118 this end, we purified lipidated functional *M. catarrhalis* TbpB for the assay  
119 (Supplementary Fig. 6). Translocation of TbpB was assessed by sensitivity to proteinase  
120 K. Only the urea unfolded purified TbpB was successfully translocated into Slam1  
121 proteoliposomes (~3% insertion), but not in empty liposomes or Bam proteoliposomes

122 (Fig. 1b, 1c). The addition of the Bam complex contributed little to no effects into the  
123 TbpB translocation efficiency, suggesting that Bam complex does not involve in this  
124 process. Furthermore, the low efficiency of insertion observed for the defined system  
125 together with the observation that translocation across the pore only occurs when the  
126 TbpB is denatured by urea lead us to hypothesis that there are likely additional  
127 periplasmic factors that keep the SLP unfolded for an efficient translocation.

128

129 **Translocation of TbpB via Slam1 requires periplasmic components but the**  
130 **process is independent from the release of TbpB from the inner membrane.**

131 To delve deeper into the mechanism of Slam-mediated SLP translocation and whether  
132 additional of periplasmic contents are required for efficient translocation, we examined  
133 the translocation of TbpB presented by *E. coli* spheroplasts that lack an intact outer  
134 membrane (Norell et al, 2014) (Fig. 2a). TbpB expressed in spheroplasts are displayed  
135 on the outer surface of the inner membrane (Hooda et al, 2016). Previous studies have  
136 shown that addition of the periplasmic chaperone LolA leads to release of SLPs from  
137 spheroplasts in the culture supernatant (Tajima et al, 1998). Hence, we purified *E. coli*  
138 LolA and tested LolA-dependent release of Mcat TbpB from spheroplasts  
139 (Supplementary Fig.7). Higher amounts of TbpB were detected in the supernatant in the  
140 presence of LolA. We incubated the TbpB expressing spheroplasts directly with Slam1 or  
141 Bam proteoliposomes and estimated the translocation efficiency of TbpB using a  
142 proteinase K assay (spheroplast-dependent translocation). Any TbpB translocated into  
143 the lumen of the proteoliposome should be protected from proteinase K digestion. From  
144 this assay, we found that proteoliposomes containing Slam1 showed significantly higher  
145 protection (40%) compared to Bam proteoliposomes or empty liposomes (5%) (Fig. 2b –  
146 upper panel). The protection of TbpB was lost upon the addition of Triton X-100

147 suggesting that TbpB is shielded from the protease activity by the lipid bilayer of the  
148 liposomes. The background protection observed in empty and Bam proteoliposomes is  
149 inherent in the procedure, as the assay that was repeated in the absence of any  
150 liposomes resulted in similar levels of protection suggesting that the background  
151 protection may originate from the spheroplasts themselves. Interestingly,  
152 proteoliposomes containing both Bam complex and Slam once again did not improve the  
153 efficiency, indicating that the translocation of TbpB does not require Bam complex (Fig.  
154 2c).

155

156 The success of the *in vitro* Slam dependent translocation of spheroplast-released SLPs  
157 into liposomes provided an assay to investigate SLP translocation in greater detail. Many  
158 outer membrane proteins require inner membrane factors for energy transduction such  
159 as TonB-dependent receptors (Pawelek et al, 2006) or chaperone activity TamA  
160 (Stubenrauch et al, 2016) to perform their function. Studies of the Lol System have  
161 shown that unlike the Lpt system (Sherman et al, 2018), LolA shuttles between the inner  
162 membrane and the outer membrane (Szewczyk and Collet, 2016), and hence we  
163 predicted that Slam-mediated SLP translocation does not require any inner membrane  
164 factors. To validate this hypothesis, we incubated empty, Bam, Slam1 or Bam+Slam1  
165 proteoliposomes with the supernatant isolated from spheroplasts that were expressing  
166 TbpB (spheroplast-independent translocation). As seen previously in the spheroplast-  
167 dependent translocation assay, we observed TbpB protection from proteinase-K in  
168 proteoliposomes containing Slam1 (~40% protection) and Bam+Slam1 (~35%) (Fig. 2b -  
169 lower panel) but not empty (~7%) nor Bam (~5%) proteoliposomes. Interestingly, we did  
170 not observe any loss in translocation efficiency between spheroplast-dependent and  
171 spheroplast-independent assay (Fig. 2c), confirming that Slam-mediated SLP

172 translocation is independent of SLP release from the inner membrane. This differs from  
173 other secretion systems that require partners in the inner membrane who provide energy  
174 through ATP/proton motive force (Sherman et al, 2018; Stubenrauch et al, 2016). This  
175 finding suggests Slam-dependent SLP translocation is akin to two-partner secretion  
176 systems (Fan et al, 2012; Norell et al, 2014; Guérin et al, 2017)

177

### 178 **Periplasmic chaperone Skp interacts with pre-folded TbpB in the periplasm.**

179 As previously mentioned above, the Slam1-dependent translocation requires  
180 TbpB to be unfolded and hence, we hypothesized that other factors in the periplasm bind  
181 the SLPs and prevent their premature folding prior to Slam mediated translocation. To  
182 identify periplasmic factors that might be involved in the translocation, periplasmic TbpB  
183 complexes were isolated using an affinity flag-tag on its C-terminus. The pulldown  
184 fraction was analyzed using mass spectrometry (MS). In this pulldown assay, AfuA – a  
185 well-folded periplasmic protein from *Actinobacillus pleuropneumoniae* was used as a  
186 negative control to rule out non-specific periplasmic protein interactions (Sit et al, 2015).  
187 Skp – a periplasmic chaperone was the only protein that was identified in the pulldown of  
188 TbpB but not in the negative control (Table 1). The mass spectrometry results were  
189 validated using  $\alpha$ -Skp antibody and confirming Skp interacts with TbpB in the periplasm  
190 (Fig. 3a). Skp is a homo-trimeric chaperone that binds to unfolded OMPs in the  
191 periplasm and is involved in OMP membrane insertion through the Bam complex (Sklar,  
192 et al 2007). Our findings suggest that Skp also interacts with TbpB-like SLPs in the  
193 periplasm and assists in their translocation across the outer membrane.

194



195 To further validate the interaction between Skp and SLPs, a reciprocal pulldown assay  
196 was performed in which a purified His-tagged chaperone was added into the spheroplast  
197 prior to the secretion of SLPs. In this assay, we also examined whether Skp interacts  
198 with other SLPs such as hemoglobin-haptoglobin utilization protein (HpuA) - a substrate  
199 of Slam2 homolog in *N. meningitidis* (Hooda et al, 2016) (Fig. 3b). In addition to Skp, two  
200 other periplasmic chaperones which are known to be involved in the transport of OMPs,  
201 SurA and DegP, (Sklar et al, 2007) were also examined. The co-immunoprecipitation  
202 experiments confirmed that only periplasmic chaperone Skp interacts with the  
203 spheroplast-released TbpB and HpuA. Chaperone SurA showed no binding to TbpB,  
204 while DegP showed modest interaction in line with peptide counts obtained in mass  
205 spectrometry (Table 1).

206

### 207 **Periplasmic chaperone Skp is essential for Slam-dependent translocation in *E. coli***

208 To determine whether Skp is essential for the translocation of SLPs via Slam, TbpB and  
209 Slam1 were reconstituted in K12 *E. coli* strains devoid of functional Skp or DegP (as a  
210 negative control) (Baba et al, 2006). The presence of TbpB on the surface of *E. coli* was  
211 detected using rabbit  $\alpha$ -flag antibody, followed by phycoerythrin-conjugated  $\alpha$ -rabbit IgG  
212 which fluoresces at 575nm. The results showed that only *E. coli* K12  $\Delta$ *skp* mutant had  
213 significant reduction of TbpB's surface exposure (50%) compared to wildtype cells.  
214 Depletion of DegP slightly reduced the translocation of TbpB but this was not statistically  
215 significant. No reduction in the expression of either Slam1 or TbpB was observed in  
216 western blots. Furthermore, the processing of TbpB by signal peptidase II and  
217 subsequent release from the inner membrane was unaffected suggesting the defect in  
218 surface display by Skp occurs after the release of TbpB from the inner membrane (Fig.  
219 4a).

220

221 To further investigate the role of periplasmic chaperone Skp, we leveraged our *in vitro*  
222 translocation assay using Slam1 proteoliposomes and spheroplast-secreted TbpB .  
223 TbpB that was secreted from K12 spheroplast mutants that lacked Skp or DegP, was  
224 incubated with Slam1 proteoliposomes for translocation. The overall results were  
225 consistent with the *in vivo* translocation in K12 *E. coli*. In comparison with wildtype-  
226 spheroplast TbpB, the  $\Delta skp$ -spheroplast-secreted TbpB failed to translocate inside of  
227 Slam1 proteoliposomes, while the translocation efficiency of  $\Delta degp$ -spheroplast-secreted  
228 TbpB was only marginally reduced (Fig. 4b). This suggests that Slam-mediated  
229 translocation of SLPs requires the periplasmic chaperone Skp.

230

### 231 **Skp increases the translocation of purified TbpB in Slam1-containing** 232 **proteoliposomes**

233 Given that Skp is necessary for Slam-mediated translocation, we hypothesized that  
234 addition of purified *E. coli* Skp should increase the translocation efficiency of purified  
235 TbpB into Slam1 proteoliposomes. To test this hypothesis, we purified *E. coli* Skp and  
236 LolA and added these to urea-denatured TbpB prior to incubation with Slam1-containing  
237 proteoliposomes. Periplasmic chaperone SurA was also purified and used as a negative  
238 control as we have showed that SurA does not interact with TbpB. As expected, in the  
239 presence of Skp, the translocation efficiency of TbpB increased ~ 5-fold in comparison  
240 with SurA (Fig 4c). Curiously, the addition of Skp to the empty liposomes also increased  
241 TbpB's protection by 2 folds. This protection might be from the protease resistance that  
242 chaperones provide for their substrates in the periplasm which has previously reported  
243 also seen for unfolded OMPs (Yan et al, 2019) (Fig. 4c). Furthermore, this result was

244 consistent with the background protection observed in the spheroplast secretion  
245 translocation assays which contained periplasmic components (Fig. 2b). To confirm that  
246 the background protection is from the protease resistance of chaperone-substrate  
247 complex, the samples were spun down against a sucrose gradient (0-60% w/v) after the  
248 proteinase K treatment to isolate the proteoliposomes. The western blots and Coomassie  
249 blue stained SDS-PAGE showed a clear separation of the two components (Fig. 4d).  
250 While most of the proteins were in the bottom and middle fraction, significant amount of  
251 Slam1 and TbpB were found only in the liposomes fraction collected from the top layer. A  
252 3-fold increase in translocation efficiency for TbpB was observed in the presence of Skp  
253 compared with SurA and this ratio is consistent with the previous result if accounting for  
254 the 2-fold protection coming from the Skp-TbpB interaction. Taken together, these  
255 results suggest that Skp potentially plays an important role in the translocation of TbpB  
256 to the surface via Slam1, likely through its holdase function.

257

258 **Deletion of Skp in B16B6 decreases the exposure of TbpB on the surface of *N.***  
259 ***meningitidis*.**

260 To examine the role of Skp in the Slam-dependent translocation of SLPs in *N.*  
261 *meningitidis* that contains endogenous TbpB and Slam1, we deleted the gene *skp*  
262 (Supplementary Fig. 8, 9) and examined its effect on surface display of TbpB. Such  
263 experiments have been previously done in other studies for periplasmic chaperones  
264 SurA, Skp and DegQ (homologs of DegP) in *N. meningitidis* in which a single deletion of  
265 either one of the chaperones did not affect cell vitality, as well as the expression of  
266 OMPs or their insertion into the outer membrane via the Bam complexes (Volokhina et  
267 al, 2011). In our study, the deletion of Skp overall did not affect the growth of *N.*  
268 *meningitidis* as the cells reached the optimal OD<sub>600</sub> after 12h with a lagging phase at the

269 beginning (Supplementary Fig. 10). In this assay, we used  $\alpha$ -TbpB antibody to probe for  
270 TbpB on the cell surface. Unlike the two negative controls ( $\Delta tbpB$  and  $\Delta Slam1$ ) which  
271 completely inhibit the translocation of TbpB, deletion of Skp reduces the amount of TbpB  
272 about 50% comparing to the wildtype strain (Fig. 5a – top panel). Interestingly, the  
273 expression of either Slam1 or TbpB was not affected which suggests the reduction of  
274 TbpB on the surface might be due to the translocation (Fig 5b). This result is consistent  
275 with the translocation of Mcat TbpB to the surface of *E. coli*  $\Delta skp$  mutant in which the  
276 signal from the C-terminal flag-tag was used to access the surface display of the protein  
277 (Fig. 4c). To examine whether these surface exposed TbpB in B16B6  $\Delta skp$  strain is  
278 functional, we probed the cells using biotinylated human transferrin (Calmettes et al,  
279 2012). A 5-fold reduction in binding to biotinylated human transferrin was observed for  
280  $\Delta skp$  *N. meningitidis* strain, indicating a significant loss of functional TbpB assembled on  
281 the surface of *N. meningitidis* (Fig. 5a – bottom panel). The complementation of Skp from  
282 pGCC4 vector successful rescued the translocation of TbpB of the B16B6  $\Delta skp$  strain  
283 back to the wildtype level. Taken together, in the absence of the periplasmic chaperone  
284 Skp, less TbpB are translocated to the surface of *N. meningitidis* and these TbpB also  
285 fails to be functionally assembled to bind to biotinylated human transferrin.

286

## 287 **Discussion:**

288 In this study, we described Slam as an outer membrane translocon responsible for the  
289 transport of TbpB-like SLPs to the surface of Gram-negative bacteria. By using an *in*  
290 *vitro* assay to reconstitute the translocation of TbpB across a biological membrane, we  
291 showed that Slam1 is necessary to translocate TbpB independently from other outer  
292 membrane machineries such as the Bam complex. Unlike other translocons that require  
293 energy such as ATP or proton motive force to mediate translocation, we found that

294 Slam1 instead requires periplasmic chaperones to keep pre-folded TbpB available for  
295 efficient translocation. In *E. coli* model, Skp was found to interact with TbpB and HpuA in  
296 the periplasm after these SLPs were released from the inner membrane. Existing in the  
297 trimeric form, chaperone Skp is known to act as a holdase for the pre-folded OMPs as  
298 they localize across the periplasm prior to their insertion into the outer membrane by the  
299 Bam complex (Sklar et al, 2007; Mas et al, 2019). Given that TbpB and HpuA contain at  
300 least one beta-barrel domain similar to OMPs (Calmettes et al, 2012; Wong et al  
301 2015), Skp might interact with these SLPs in similar manner to keep them in their pre-  
302 folded states before translocation (Walton et al, 2009). In our *in vitro* reconstitution  
303 assays, the presence of Skp is important for an efficient translocation of TbpB into Slam1  
304 proteoliposomes. The deletion of *skp* in *N. meningitidis* did not affect the expression of  
305 neither OMP Slam1 or TbpB but decreased amount of TbpB on the cell surface.  
306 Furthermore, the TbpB on the surface of *N. meningitidis*  $\Delta skp$  is not functional as these  
307 TbpB fail to bind to biotinylated human transferrin. We do not yet know whether these  
308 TbpB were misfolded after the translocation or only part of TbpB was exposed on the  
309 surface. Further investigation will be needed to understand how TbpB-Skp complex is  
310 recognized and translocated by Slam1, as well as how TbpB is folded once it localized to  
311 the surface. Taken together, our data suggest that periplasmic chaperone Skp is  
312 required to keep SLPs in their pre-folded states in the periplasm for proper translocation  
313 to the surface of Gram-negative bacteria via the Slam translocon.

314

315 Combined with our previous work (Hooda et al, 2016), we propose a model for the SLPs  
316 localization from the inner membrane to the surface of Gram-negative bacteria  
317 (Supplementary Fig. 11). Upon emerging from the Sec translocon, periplasmic  
318 chaperone Skp binds to SLPs and keeps them in the pre-folded state. The SLPs are

319 then modified and lipidated before being transferred to the Lol complex. As the SLPs are  
320 released into the periplasm, LolA accommodates the N-terminal triacyl lipid group while  
321 Skp remains bound to the SLPs to prevent them from prematurely folding prior to being  
322 translocated by Slam. Upon their insertion into the inner leaflet of the outer membrane,  
323 LolA:SLP:Skp complexes are recognized by Slam for translocation to the cell surface.  
324 Drawing from similarities between two-partner secretion (Guérin et al, 2017) and the  
325 Slam system, we propose the movement of the SLP across the outer membrane occurs  
326 via the Slam membrane domain. Interestingly, Slam substrates such as TbpB or HpuA  
327 also contain a lipid anchor which needs to be flipped from the inner leaflet of the outer  
328 leaflet, which suggests the presence of a lateral opening in the Slam membrane domain  
329 that allows for movement of lipid anchor, similar to ones observed in BamA (Noinaj et al,  
330 2013) and LptD (Gu et al, 2015). Given that Slam translocon seems to require no energy  
331 input, we speculate that the folding of SLPs on the surface might provide driving force to  
332 further pull the SLPs through Slam barrel domain. High resolution structural and  
333 biochemical studies of Slam will be required to reveal the details of SLPs translocation  
334 mechanism.

335

336

## 337 **Materials and Methods:**

### 338 **Bacterial strains and growth conditions:**

339 Strains used in this study are summarized in Supplementary Table 1. *E. coli* were grown  
340 in LB media containing antibiotics when necessary – 50 µg/mL kanamycin, 50µg/mL  
341 erythromycin and 100 µg/mL ampicillin. Cloning procedures were carried out using *E.*  
342 *coli* MM294 competent cells. Protein expression was performed using *E. coli* C43 (DE3)  
343 cells for Slam homologs, Bam complex and the translocation experiments (Wagner et al,  
344 2008). *E. coli* BL21 (DE3) cells were used for purification of *E. coli* LolA, SurA, Skp,  
345 DegP and B16B6 *N. me* Skp. *In vivo* translocation reconstitution and spheroplast  
346 secretion assays were performed using *E. coli* C43 (DE3) or *E. coli* K12 cells from Keio's  
347 collection (Baba et al, 2006). *N. meningitidis* B16B6 strain was used for knock-out study.

### 349 **Cloning of Slam, SLPs, LolA and periplasmic chaperones:**

350 Genes were cloned into expression vectors by RF cloning (van den Ent and Löwe, 2006)  
351 and signal peptides and tags were inserted using round the horn cloning (Liu and  
352 Naismith, 2008). pET52 *Nme* HpuA was made by amplifying *hpua* from *N. meningitidis*  
353 strain B16B6 and inserting it into an empty pET52b vector. pET52 *Nme* HpuA-flag was  
354 made by addition of a flag-tag at the C-terminus of the *hpua* gene in pET52 *Nme* HpuA.  
355 pET26 *Ngo* Slam2 construct was obtained by cloning the mature *N. gonorrhoeae* strain  
356 MS11 gene *ngfg\_00064* and inserting into empty pET26b vector. To be expressed in  
357 K12 *E. coli*, *slam1* and *tbpb* were cloned on pGCC4 and pHERB plasmid respectively. *E.*  
358 *coli* *lola*, *sura*, *skp*, *degp* genes from *E. coli* strain C43 (DE3) genome and *N.*  
359 *meningitidis* *skp* gene from *N. meningitidis* B16B6 strain were cloned into an empty

360 pET28a vector with an N-terminal 6xHis tag for purification. The constructs used in this  
361 study are summarized in Supplementary Table 1.

362

### 363 **Plate reader assay for Slam-SLP *in vivo* translocation assay:**

364 Pairs of Slams and SLPs were co-transformed into *E. coli* C43(DE3) or *E. coli* K12 cells.  
365 Cells were grown overnight in autoinduction media (Studier, 2005) with appropriate  
366 antibiotics as described above. Cells were harvested from the overnight culture by  
367 centrifugation at 1500 $\times$ g, 3 mins. Cell pellets were washed gently with PBS + 1mM  
368 MgCl<sub>2</sub> before incubating with biotinylated human transferrin or rabbit  $\alpha$ -Flag antibody  
369 (1:200 dilution). After 1-hour incubation, cells were harvested and washed with PBS +  
370 1mM MgCl<sub>2</sub>. The cells were then incubated with streptavidin-conjugated-phycoerythrin  
371 (for biotinylated human transferrin) or  $\alpha$ -rabbit IgG-conjugated phycoerythrin (for rabbit- $\alpha$ -  
372 flag antibody) with 1:200 ratio for 1 hr. Cells were then harvested, washed and  
373 resuspended in PBS + 1mM MgCl<sub>2</sub>. The samples were aliquoted on a 96-well plate and  
374 read on a Synergy 2 (BioTek) plate reader at 488nm and 575nm. OD600 was also  
375 recorded for data normalization.

376

### 377 **Purification of Slams:**

378 *E. coli* strain C43 (DE3) with pET26 Mcat Slam1 were grown overnight at 37°C in LB +  
379 ampicillin. The cells were used to inoculate (1:1000) 6 L of autoinduction media +  
380 kanamycin. Cells were grown at 20°C for 48 hours and then harvested by centrifugation  
381 at 12200 $\times$ g for 20 minutes at 4°C. The cell pellets were resuspended in 20 ml/L of 50  
382 mM Tris-HCl pH 8, 200 mM NaCl and cells were lysed using an EmulsiFlex C3  
383 (Avestin). Lysates were spun down at 35000 $\times$ g at 4°C for 10 min. The supernatants



384 were spun down in a 45Ti rotor at 40,000 rpm for 1 hour at 4°C to isolate total  
385 membranes. Membrane pellets were homogenized, incubated in 15 ml/L of 50 mM Tris  
386 pH 8, 200 mM NaCl, 3% Elugent overnight at 4 °C and the ultracentrifugation step was  
387 repeated to remove insoluble membrane pellet. Supernatants containing the soluble  
388 membrane proteins were then incubated with 1 ml Ni-NTA agarose O/N at 4°C. Ni-NTA  
389 beads were washed three times with 10 column volumes of buffer A (20 mM Tris pH 8,  
390 100 mM NaCl, 0.03% DDM) containing increasing concentration of imidazole. Mcat  
391 Slam1 was then eluted in buffer A containing 200 mM imidazole. The protein sample was  
392 exchanged into low salt buffer (20 mM Tris pH 8, 20 mM NaCl, 0.03% DDM) using a PD-  
393 10 column (GE Healthcare) and then injected onto a MonoQ column (GE Healthcare)  
394 equilibrated with low salt buffer. The column was washed with increasing concentration  
395 of salt using a high salt buffer (20 mM Tris pH 8, 2M NaCl, 0.03% DDM). Fractions that  
396 contained pure Mcat Slam1 were identified using SDS-PAGE gels, pooled, concentrated  
397 and stored at -80°C.

398

399 For Ngo Slam2 purification, the protocol described above for the expression and  
400 purification for Mcat Slam1 was followed up to the NiNTA purification step. Upon elution,  
401 Ngo Slam2 samples were concentrated and run on a S-200 column (GE) equilibrated  
402 with buffer A. Fractions that contained pure Ngo Slam2 were identified using SDS-PAGE  
403 gels, pooled, concentrated and stored at -80°C.

404

#### 405 **Purification of Bam complex:**

406 The plasmid and protocol for Bam complex purification was adapted from Dr. Bernstein's  
407 group (Roman-Hernandez *et al*, 2014). *E. coli* strain C43 (DE3) with pJH114 was grown

408 overnight at 37°C in LB + ampicillin. The cells were used to inoculate (1:1000) into 6L of  
409 autoinduction media + ampicillin. Cells were grown at 20°C for 48 hours and harvested  
410 by centrifugation at 12200xg for 20 minutes at 4°C. Cell pellets were resuspended in 20  
411 ml/L of 50 mM Tris-HCl pH 8, 200 mM NaCl and cells were lysed using an EmulsiFlex  
412 C3 (Avestin). Lysates were spun down at 35000xg at 4°C for 10 min. The supernatants  
413 were spun down in a 45Ti rotor at 40,000 rpm for 1 hour at 4°C to isolate total  
414 membranes. Membrane pellets were homogenized, incubated in 15 ml/L of 50 mM Tris  
415 pH 8, 200 mM NaCl, 3% Elugent overnight at 4°C, and the ultracentrifugation step was  
416 repeated. Supernatants containing the soluble membrane proteins were then incubated  
417 with 1 ml Ni-NTA agarose O/N at 4°C. Ni-NTA beads were washed with one column  
418 volume with buffer A containing increasing concentration of imidazole. BamABCDE was  
419 then eluted in buffer A containing 200 mM imidazole. The protein sample was  
420 concentrated and injected onto a S-200 column equilibrated with buffer A. Fractions that  
421 contained complete BamABCDE complexes were identified using SDS-PAGE gels,  
422 pooled, concentrated and stored at -80°C.

423

#### 424 **Liposome and proteoliposome preparation:**

425 100 mg of *E. coli* polar lipid extract (Avanti) was resuspended in chloroform (Sigma). The  
426 lipid solution was then dried off under N<sub>2</sub> gas and resuspended in 10 mL of buffer B (50  
427 mM Tris-HCl pH 7, 200 mM NaCl). The solution was flash frozen and thawed 5 times  
428 and stored at -80°C as a 10 mg/mL stock. For each experiment, 1mL of the liposome  
429 solution (10 mg/mL) was extruded through a 0.2µm filter (Whatman) to make unilamellar  
430 liposomes. The extruded solution was split and the purified outer-membrane proteins  
431 (Bam complex and Slam1&2) were diluted 1:5 into the liposome solutions at 1.5µM for  
432 Bam and 15µM for Slam1&2. 50 mg of Biobeads SM-2 (BioRad) were added to remove

433 detergent and promote protein insertion into liposomes. Tubes were sealed with parafilm  
434 and kept at room temperature with gentle end-to-end rotation for ~ 2 hours. Beads were  
435 changed 2 more time and the proteoliposomes were incubated at 4°C overnight with  
436 end-to-end rotation. Proteoliposomes were separated from Biobeads and spun down at  
437 18000×g at 4°C for 5 minutes. The supernatant was kept at 4°C and used for the  
438 experiments within a week. The insertion of Slam1&2 and the Bam complex was  
439 assessed by SDS-PAGE gels, silver stain and western blots with  $\alpha$ -His antibody.

440

#### 441 **Sucrose floatation assay:**

442 The protocol used for the sucrose floatation assay was adapted from Dr. Müller's group  
443 (Fan *et al*, 2012) with a few modifications. 200  $\mu$ l of Bam and Slam1 proteoliposomes  
444 were resuspended in 1000  $\mu$ l solution containing 60% sucrose (w/v) and transferred to a  
445 5 ml thin-wall polypropylene Beckman tube. The 60% sucrose was layered with 3.8 ml of  
446 30% sucrose and 200  $\mu$ l of buffer B. The samples were spun in a Beckman SW 50.2 Ti  
447 rotor at 45,000 rpm for 16 hrs at 4 °C. Upon ultracentrifugation, 500  $\mu$ l fractions were  
448 collected from the top. Each fraction was precipitated with 5% TCA, washed 3 times with  
449 100% acetone. The samples were resuspended in 100  $\mu$ l of 1xSDS buffer and alternate  
450 fractions (1<sup>st</sup>, 3<sup>rd</sup>, 5<sup>th</sup>, 7<sup>th</sup> and 9<sup>th</sup>) were run on an SDS-PAGE gel. Western blots were  
451 completed with  $\alpha$ -His antibody to estimate the quantity of Mcat Slam1 and BamABCDE  
452 present in each of the fractions.

453

#### 454 **Purification of periplasmic chaperones from *E. coli* and *N. meningitidis*:**

455 Purifications were performed similarly for the soluble proteins. *E. coli* BL21 (DE3) cells  
456 expressing either *E. coli* LolA, SurA, Skp, DegP or *N. meningitidis* Skp were grown in 20

457 mL of LB + kanamycine overnight at 37°C and used for inoculating 2 L of 2YT media.  
458 The cells were grown at 37°C to an OD<sub>600</sub> ~ 0.6, induced with 1 mM IPTG and then  
459 incubated overnight at 20°C. The cells were harvested the next day by centrifugation at  
460 12200×g for 20 minutes at 4°C. The pellets were resuspended in buffer B (50 mM Tris-  
461 HCl pH 7, 200 mM NaCl). Cell lysis was performed using EmulsiFlex C3 (Avestin). The  
462 cell lysates were spun down at 35000×g at 4°C for 50 minutes to remove cell debris.  
463 Supernatant was filtered through 0.22µm filter and incubated with 1 mL of Ni-NTA beads  
464 for 2 hours at 4°C with gentle stirring. The solution was applied to a column and the Ni-  
465 NTA beads were subsequently washed 3 times with 10mL buffer B with increasing  
466 concentrations of imidazole (10 mM, 20 mM and 40 mM). Proteins were eluted from the  
467 Ni-NTA beads by adding buffer B with 200 mM imidazole. The purified proteins were  
468 dialyzed overnight in buffer B at 4°C. The proteins were further purified using S75 or  
469 S200 gel filtration (GE Healthcare). The purity of proteins was accessed on SDS-PAGE.  
470 The proteins were either stored at -80°C or sent for antibody production.

471

#### 472 **Spheroplast release assay:**

473 The protocol was adapted from Dr. Müller's group (Fan *et al*, 2012) with a few  
474 modifications. Briefly, spheroplasts were obtained from *E. coli* C43(DE3) or *E. coli* K12  
475 cells transformed with either pET52 Mcat TbpB-flag or pET52 *Nme* HpuA-flag or pHERD  
476 Mcat TbpB-flag (*E. coli* K12 only). The cells were grown in LB with 100µg/mL ampicillin  
477 and induced for expression by 0.5mM IPTG (*E. coli* C43) or 0.1% arabinose (*E. coli* K12)  
478 overnight at 20°C. *E. coli* cells were adjusted to have OD<sub>600</sub> ~ 1.0. The cells were  
479 harvested by centrifugation at 6800×g for 2 minutes at 4°C. The pellets were then  
480 resuspended in 100µL of buffer containing 50 mM Tris-HCl pH 7 and 0.5 M sucrose. The  
481 resuspended solutions were kept on ice and converted to spheroplasts by adding 100 µL

482 of buffer containing 0.2 mg/mL lysozyme and 8 mM EDTA with gentle inversion for  
483 mixing. The solutions were incubated on ice for at least 20 minutes. The spheroplasts  
484 were collected by spinning at 10,000×g for 10 min and resuspended in 100 µL of M9  
485 minimum media containing M9 minimal salts, 2% glucose and 0.25 µM sucrose.  
486 Expression of SLPs was resumed by addition of 0.5 mM IPTG or 0.1% arabinose. 10 µM  
487 of *E. coli* LolA was added to promote the release of SLPs from the spheroplasts at 37°C.  
488 Samples were collected at different time points and spun down at 18000×g for 10  
489 minutes at 4°C to remove spheroplasts. Supernatant at different time points were mixed  
490 with SDS loading buffer and run on an SDS-PAGE gel. Western blot analysis using α-  
491 Flag antibody to estimate the quantity of TbpB and HpuA released by spheroplasts upon  
492 the addition LolA.

493

#### 494 **Bam complex functional assay:**

495 To test the activity of the Bam complex, the ability of Bam proteoliposomes to potentiate  
496 the insertion of spheroplast released OmpA was used. *E. coli* strain C43 (DE3) cells  
497 were converted into spheroplasts and recovered in M9 minimal media as previously  
498 described. Spheroplasts were then spun down at 18000×g at 4 °C for 10 minutes to  
499 isolate the secreted supernatant. Supernatant was spun down again at 60000×g at 4 °C  
500 to further remove insoluble and remains of outer membrane. Top 200µL of the soluble  
501 fraction was collected and kept on ice. 10µL of iced-cold supernatant was incubated with  
502 either 10µL of buffer B (liposome buffer), empty liposome or Bam proteoliposome.  
503 Incubations were started every 5 minutes and all reactions was stopped at the same time  
504 by adding 5µL of 5×SDS loading buffer. Samples of 0, 5, 10 and 20 minutes were loaded

505 on SDS-PAGE and followed by  $\alpha$ -OmpA western blot to access the folding process of *E.*  
506 *coli* OmpA in the presence of Bam proteoliposome.

507

### 508 **Purification of Mcat TbpB:**

509 *E. coli* C43 (DE3) cells was transformed with pET52b Mcat TbpB flag-tag. The cells were  
510 grown in 20mL of LB + 100  $\mu$ g/mL ampicillin overnight at 37°C and were used to  
511 inoculate 2L of 2YT + 100  $\mu$ g/mL ampicillin the next day. Once OD<sub>600</sub> reached 0.6, 1mM  
512 IPTG was added to induce Mcat TbpB-flag and the protein expression was carried  
513 overnight at 20°C. The purification was performed similarly to Slam and Bam outer  
514 membrane protein purification protocol. After the membranes were extracted and  
515 solubilized in 50mM Tris pH 8, 200mM NaCl and 0.1% DDM, 100 $\mu$ L of flag-beads  
516 (sigma) was added into the solution and incubated for 4h at 4°C. The beads were loaded  
517 on a gravity column and washed 3 times with 5mL of 50mM Tris pH 8, 200mM NaCl,  
518 0.03% DDM. Mcat TbpB-flag was eluted by adding 500 $\mu$ L of 0.1M glycine, pH 3.5,  
519 0.03% DDM and 100 $\mu$ L of 1M Tris pH 8 was immediately added into the eluted fraction.  
520 A280 of the last eluted droplet was measured to determine whether additional volume is  
521 needed to elute more protein. All eluted fractions were pooled and concentrated to 0.5  
522 mg/mL. The protein was flash-freezed in liquid nitrogen and stored at -80°C for *in vitro*  
523 proteoliposomes assay.

524

### 525 **Dot blot assay for testing function of TbpB:**

526 0.5  $\mu$ l of TbpB (1 mg/ml), TbpA (1 mg/ml), BSA (1 mg/ml) and BamABCDE (1 mg/ml)  
527 was spotted on a nitrocellulose membrane. The cells were blocked with 5% skim milk

528 and then developed with a biotinylated human transferrin (50 µg/ml) followed by  
529 streptavidin conjugated HRP.

530

### 531 **Translocation assay with purified TbpB:**

532 To develop the defined translocation assay, purified TbpB was diluted to 6 µM in buffer B  
533 or 8M urea. The TbpB samples were rapidly diluted 1/12 into 50µL of Empty, Bam,  
534 Slam1&2 and Bam+Slam1&2 proteoliposomes to bring the final concentration of TbpB to  
535 0.5 µM and urea to 0.66 M. The samples were incubated for 15 min at 37°C with addition  
536 of 10mg biobeads. The solutions were isolated and then incubated with proteinase K (0.5  
537 mg/ml) in the presence or absence of Triton X-100 (1%). Samples were incubated at  
538 room temperature for 30 min. 5mM PMSF was then added to inhibit proteinase K.  
539 Samples were then run on SDS-PAGE, followed by western blotting and α-flag antibody  
540 was used to detected TbpB.

541

### 542 **Spheroplast-dependent translocation assay:**

543 To develop the spheroplast-dependent translocation assay, we followed the protocol  
544 described above for the generation of spheroplasts. Spheroplasts were collected by  
545 spinning at 10,000×g for 10 minutes and resuspended in 100 µL of M9 minimum salt  
546 media containing M9 minimal salts, 2% glucose, 0.25 µM sucrose, and 10 µM of *E. coli*  
547 LolA. Subsequently, 50µL of empty liposomes or Bam, Slam1 or Bam+Slam1  
548 proteoliposomes were added to the separate tubes of the spheroplasts. Expression of  
549 TbpB was induced by the addition of 1 mM IPTG and incubation at 37°C for 15 minutes.  
550 Spheroplasts were spun down at 18000×g for 10 minutes at 4°C. Supernatants were  
551 collected and treated with the final concentration of 0.5 mg/mL proteinase K in the

552 presence/absence of 1% Triton X-100 and incubated at 37°C for 1 hour. 5mM PMSF  
553 was added to inactivate the proteinase K and samples were loaded on SDS-PAGE gels  
554 followed by western blots with  $\alpha$ -flag antibodies to assess protection from proteinase K  
555 activity.

556

### 557 **Spheroplast-independent translocation assay:**

558 A similar protocol was performed for spheroplast-independent translocation assay. After  
559 30 minutes of spheroplasts resuming protein expression in M9 media with addition LolA,  
560 the solution was spun down at 16000xg for 10 minutes at 4°C. 50  $\mu$ L of obtained  
561 supernatant was incubated with 50 $\mu$ L of Empty, Bam, Slam1 or Bam+Slam1  
562 proteoliposomes for additional 15 mins at 37°C (1:1). The samples were then treated  
563 with proteinase K (0.5 mg/ml) in the presence or absence of Triton X-100 (1%) as  
564 described in the previous section.

565

### 566 **TbpB pulldown assay:**

567 C-terminal flag-tagged TbpB was released from *E. coli* spheroplasts as described above.  
568 After 15 minutes of incubating with LolA, spheroplasts were removed by spinning down  
569 at 16000xg for 20 minutes at 4°C. 1mL of supernatant was obtained and incubated with  
570 50 $\mu$ L pre-washed flag beads at 4°C for 2h. Beads were spun down at 700xg at 4°C for  
571 10 minutes and supernatant was collected as flow through (FT). Beads were washed 3  
572 times with 1mL of 1x M9 media. Beads samples were sent to mass spectrometry facility  
573 (SPARC – Sickkids) for trypsin digestion and analysis. For eluting protein complex,  
574 beads were incubated with 200 $\mu$ L of 50mM glycine pH 2.8 at room temperature for 5  
575 minutes. Beads were spun down at 700xg at 4°C for 10 minutes and supernatant was



576 collected as elution (E). All samples were treated with 5× SDS loading buffer and pH was  
577 adjusted before loading on SDS-PAGE followed by western blotting. TbpB and AfuA (the  
578 negative control) was detected using rabbit α-flag antibody, followed by α-rabbit HPR  
579 secondary antibody. LolA was detected using mouse α-his antibody and Skp was  
580 detected using mouse α-*E. coli* Skp antibody, followed by α-mouse HPR secondary  
581 antibody.

582

### 583 **Chaperone pulldown assays:**

584 His-tagged chaperones (SurA, Skp and DegP) were purified as described above. 10μM  
585 of each chaperone was added along with 10μM untagged LolA during TbpB/HpuA  
586 expression in *E. coli* spheroplasts. After 15 minutes, spheroplasts were removed by  
587 spinning down at 16000×g for 20 minutes at 4°C. 1mL of supernatant was obtained and  
588 incubated with 20μL pre-washed Ni-resin at 4°C for 2h. Beads were spun down at 700×g  
589 at 4°C for 10 minutes and supernatant was collected as flow through (FT). Beads were  
590 washed 3 times with 1mL of 50mM Tris 7, 200mM NaCl, 10mM imidazole and 0.1%  
591 TritonX-100. Proteins were eluted with 200μL of 50mM Tris 7, 200mM NaCl, 200mM  
592 imidazole. All samples were treated with 5× SDS loading buffer and pH was adjusted  
593 before loading on SDS-PAGE followed by western blotting. TbpB, HpuA and AfuA (the  
594 negative control) were detected using rabbit α-flag antibody, followed by α-rabbit HPR  
595 secondary antibody.

596

597 **Reconstitution of Mcat Slam1 and Mcat TbpB in K12 *E. coli* strains (wildtype and**  
598 **mutants):**

599 *E. coli* K12 wildtype, K12  $\Delta skp$  and K12  $\Delta degp$  were obtained from the Keio's collection  
600 (Baba et al, 2006). These cells were co-transformed with pGCC4 *mcat slam1* (with N-  
601 terminal his-tag) and pHERD *mcat tbpb* (with C-terminal flag-tag). Successfully  
602 transformed cells were selected on LB + erythromycin (50  $\mu\text{g}/\text{mL}$ ) + ampicillin  
603 (100 $\mu\text{g}/\text{mL}$ ) plate. Cells were grown in LB media with the appropriate antibiotics until  
604  $\text{OD}_{600} \sim 0.6$  and then were treated with 0.5 mM IPTG for Slam1 overnight expression.  
605 The next day, the cells were spun down at 3,000 rpm for 5 min and the pellets were  
606 resuspended in fresh LB media (with appropriate antibiotics), recovered for 30 min at  
607 37°C, 150 rpm. 0.1% arabinose was added into the media to induce the expression for  
608 TbpB for 4 hours. The cells were then harvested and ready for plate reader assay with  
609 biotinylated human transferrin and  $\alpha$ -flag antibody as previous described above

610

### 611 **In vitro proteoliposomes translocation with addition of periplasmic chaperones:**

612 The assay was modified based on previous assay described above for purified TbpB. In  
613 this assay, 10 $\mu\text{M}$  of DDM-Mcat TbpB complex was diluted 1:10 in 50mM Tris 7, 200mM  
614 NaCl, 8M Urea buffer with addition of 20mg biobeads, 10 $\mu\text{M}$  *E. coli* LolA and 30 $\mu\text{M}$  *E.*  
615 *coli* Skp or *E. coli* SurA (negative control). The denaturation was performed at 4°C for 2  
616 hours in 1.5 mL microcentrifuge tube with end-to-end rotation. The beads and insoluble  
617 were removed by spinning down at 16,000 $\times g$  for 5 min. 50 $\mu\text{L}$  of the supernatant was  
618 then incubated with 250 $\mu\text{L}$  of either empty liposomes or Slam1 proteoliposomes (to  
619 further dilute urea concentration) with 50mg fresh SM2 bio-beads. The solutions were  
620 incubated at room temperature for 1 hour and were then treated with 0.1 mg/mL  
621 proteinase K or proteinase K + 0.1% Triton-X100 for 15 min. 1mM PMSF was added to  
622 inhibit the proteinase K before adding SDS loading buffer for gel electrophoresis and  
623 western blot.

624 For the follow-up sucrose floatation assay, the proteinase K digested proteoliposomes  
625 solutions (no TritonX-100 treatment) were mixed with 1mL of 60% sucrose and  
626 incubated on ice for 10 min. A layer of 10mL of 30% sucrose was then added on top and  
627 incubated on ice for 10 min. 1mL of 50mM Tris 7, 200mM NaCl was used to top up the  
628 13mL polyethylene tube and the solutions were spun at 27,000×g for 18 hours at 4°C  
629 using SW45 Ti rotor (Beckman). 1mL of top fraction, 10mL of middle fraction and 2mL of  
630 bottom fractions were collected for TCA precipitation (Koontz, 2014). The pellets were  
631 resuspended in 1X SDS loading buffer, followed by SDS-PAGE and α-flag western blots  
632 to estimate the quantity of Mcat TbpB in each fraction.

633

#### 634 **Gene deletion and complementation of Skp in *N. meningitidis***

635 Restriction free (RF) cloning was used for the following plasmid (Supplementary table 1).  
636 To completely replace *skp* gene with a kanamycin cassette, pUC19 Δ*skp*::kan plasmid  
637 was cloned to contain the *kan2* gene with upstream and downstream 500bp flanking  
638 region of *skp*. The plasmid was used to transform *N. meningitidis* B16B6 strain using  
639 spot transformation on BHI plate (Dillard, 2011). The plate was incubated overnight at  
640 37°C, 5% CO<sub>2</sub>. The lawn within the spot was streaked onto a BHI + 75 μg/mL kanamycin  
641 and incubated for 18 hours. Colony PCR was used to select cells that have *skp* deleted  
642 and the colony was then grown in 3mL of BHI media + 75 μg/mL kanamycin overnight at  
643 37°C, 5% CO<sub>2</sub>. The cells were adjusted to have OD<sub>600</sub> ~ 1.0 and 500μL was spun down  
644 at 3,000 rpm for 5 min while the remaining cells were used to make 30% glycerol stock  
645 and stored at -80°C. The cell pellets were resuspended in PBS buffer. 2X SDS loading  
646 buffer was then added for SDS-PAGE, followed by α-*Nme* Skp antibody to confirm the  
647 absence of Skp in the B16B6 Δ*skp* mutant.

648 Complementation vector pGCC4 Nme Skp was constructed by cloning the B16B6 *skp*  
649 gene into the PacI/FseI site of pGCC4 by RF cloning. The plasmid was used to transform  
650 B16B6 *N. meningitidis*  $\Delta skp$  strain using spot transformation. The lawn within the spawn  
651 was streaked onto a BHI + 5  $\mu$ g/mL erythromycin plate and incubated for 36 hours.  
652 Colony PCR was used to select cell colonies that have *skp* gene reintroduced. The  
653 colonies were then streaked on new BHI (+5  $\mu$ g/mL erythromycin) with 1mM IPTG plate  
654 and incubated overnight. Colonies were collected, resuspended in 1X SDS loading  
655 buffer, ran on SDS-PAGE and transferred on PVDF blots.  $\alpha$ -Nme *skp* antibody was used  
656 to access the expression of Skp from pGCC4 plasmid in the B16B6  $\Delta skp$  mutant.

657

#### 658 ***N. meningitidis* growth assay:**

659 B16B6 *N. meningitidis* wildtype,  $\Delta slam1$ ,  $\Delta tbpB$  and  $\Delta skp$  mutant was grown overnight in  
660 2mL BHI +/- 50 $\mu$ g/mL kanamycin. The OD<sub>600</sub> was adjusted to 1.0 and 2 $\mu$ L was used to  
661 inoculate 200 $\mu$ L of BHI +/- 50 $\mu$ g/mL kanamycin. The cells were grown on a 96 well-plate  
662 with 150 rpm shaking at 37°C. The OD<sub>600</sub> was recorded every 30 minutes for 24 hours  
663 using Nivo microplate reader (VICTOR Nivo).

664

#### 665 **Exposure of functional TbpB on the surface of *N. meningitidis* mutants:**

666 The cultures were started similarly to the growth assay. After adjusting the OD<sub>600</sub> to 1.0,  
667 30 $\mu$ L of cells were used to inoculate 3mL of BHI +/- kanamycin (50 $\mu$ g/mL) in a 15mL  
668 culture tube. After 4h, 0.1mM deferoxamine was added to induce expression of TbpB.  
669 1mM IPTG was also added to  $\Delta skp$  + pGCC4 Nme Skp to induce expression of Skp.  
670 The cells were grown for 16 hours at 37°C, 5% CO<sub>2</sub>. Cells were adjusted to have OD<sub>600</sub>  
671 ~ 1.0 and 1mL of cells were spun down at 3,000 rpm for 5 min. Cell pellets were washed

672 with 500 $\mu$ L of PBS + 1mM MgCl<sub>2</sub> and then resuspended in 200 $\mu$ L of PBS + 1mM MgCl<sub>2</sub>  
673 + 50 $\mu$ g/mL biotinylated human transferrin (bio-htf) or rabbit  $\alpha$ -TbpB antibody (1:200 of  
674 unknown concentration) followed by 1h incubation at 25°C. The cells were spun down at  
675 3,000 rpm for 5 min and the pellets were washed 3 times with 200 $\mu$ L of PBS + 1mM  
676 MgCl<sub>2</sub>. The cell pellets were resuspended in 200 $\mu$ L of PBS + 1mM MgCl<sub>2</sub> buffer with  
677 50 $\mu$ g/mL streptavidin-conjugated-phycoerythrin (for primary of bio-htf) or 50 $\mu$ g/mL  $\alpha$ -  
678 rabbit IgG-linked phycoerythrin (for primary of  $\alpha$ -TbpB) and incubated for 1 hour. Cells  
679 were spun down, pellets were washed 3 times, resuspended in 200 $\mu$ L of PBS + 1mM  
680 MgCl<sub>2</sub> and transferred into Greiner 96-Well Plates black flat-bottom. Fluorescence  
681 intensity was read using microplate reader (Synergy) at wavelength 488nm (excitation)  
682 and 575nm (emission). OD<sub>600</sub> was measured for normalizing the fluorescent signal.

683

## 684 **References:**

- 685 1. Baba, T., Ara, T., Hasegawa, M., Takai, Y., Okumura, Y., Baba, M., Datsenko, K. A., Tomita, M.,  
686 Wanner, B. L., & Mori, H. (2006). Construction of Escherichia coli K-12 in-frame, single-gene  
687 knockout mutants: the Keio collection. *Molecular systems biology*, 2, 2006.0008.
- 688 2. Calmettes, C., Alcantara, J., Yu, R. H., Schryvers, A. B., & Moraes, T. F. (2012). The structural basis  
689 of transferrin sequestration by transferrin-binding protein B. *Nature structural & molecular*  
690 *biology*, 19(3), 358–360.
- 691 3. Calmettes, C., Alcantara, J., Yu, R. H., Schryvers, A. B., & Moraes, T. F. (2012). The structural basis  
692 of transferrin sequestration by transferrin-binding protein B. *Nature structural & molecular*  
693 *biology*, 19(3), 358–360.
- 694 4. Cowles, C. E., Li, Y., Semmelhack, M. F., Cristea, I. M., & Silhavy, T. J. (2011). The free and bound  
695 forms of Lpp occupy distinct subcellular locations in Escherichia coli. *Molecular microbiology*, 79(5),  
696 1168–1181.
- 697 5. Dillard J. P. (2011). Genetic Manipulation of Neisseria gonorrhoeae. *Current protocols in*  
698 *microbiology*, Chapter 4, Unit4A.2.

- 699 6. Fan, E., Fiedler, S., Jacob-Dubuisson, F. & Müller, M (2012). Two-partner Secretion of Gram-negative  
700 Bacteria: a single  $\beta$ -barrel protein enables transport across the outer membrane. *J. Biol. Chem.* **287**,  
701 2591–2599.
- 702 7. Gu, Y., Stansfeld, P. J., Zeng, Y., Dong, H., Wang, W., & Dong, C. (2015). Lipopolysaccharide is  
703 inserted into the outer membrane through an intramembrane hole, a lumen gate, and the lateral  
704 opening of LptD. *Structure (London, England : 1993)*, **23**(3), 496–504.
- 705 8. Guérin, J., Bigot, S., Schneider, R., Buchanan, S. K. & Jacob-Dubuisson, F (2017). Two-Partner  
706 Secretion: Combining Efficiency and Simplicity in the Secretion of Large Proteins for Bacteria-Host  
707 and Bacteria-Bacteria Interactions. *Front Cell Infect Microbiol* **7**.
- 708 9. Hagan, C. L., Kim, S. & Kahne, D (2010). Reconstitution of outer membrane protein assembly from  
709 purified components. *Science* **328**, 890–892.
- 710 10. Hagan, C. L., Silhavy, T. J. & Kahne, D (2011).  $\beta$ -Barrel Membrane Protein Assembly by the Bam  
711 Complex. *Annual Review of Biochemistry* **80**, 189–210.
- 712 11. Hooda, Y & Moraes, TF (2018). Translocation of lipoproteins to the surface of gram-negative bacteria.  
713 *Curr Opin Struct Biol* **51**, 73–79.
- 714 12. Hooda, Y, Lai, C.C, Judd, A, Buckwalter, C. M, Shin, H. E, Gray-Owen, S. D & Moraes, T.F (2016).  
715 Slam is an outer membrane protein that is required for the surface display of lipidated virulence  
716 factors in *Neisseria*. *Nature Microbiology* **1**, 16009.
- 717 13. Hooda, Y., Lai, C. C. L. & Moraes, T. F (2017). Identification of a Large Family of Slam-Dependent  
718 Surface Lipoproteins in Gram-Negative Bacteria. *Front. Cell. Infect. Microbiol.* **7**.
- 719 14. Hooda, Y., Shin, H. E., Bateman, T. J. & Moraes, T. F (2015). Neisserial surface lipoproteins:  
720 structure, function and biogenesis. *Pathog Dis* **75**.
- 721 15. Johnson, A. E. & Van Waes, M. A (1999). The Translocon: A Dynamic Gateway at the ER Membrane.  
722 *Annual Review of Cell and Developmental Biology* **15**, 799–842.
- 723 16. Karupiah, V., Berry, J.-L. & Derrick, J. P (2011). Outer membrane translocons: structural insights into  
724 channel formation. *Trends in Microbiology* **19**, 40–48.
- 725 17. Konovalova, A., Perlman, D. H., Cowles, C. E., & Silhavy, T. J. (2014). Transmembrane domain of  
726 surface-exposed outer membrane lipoprotein RcsF is threaded through the lumen of  $\beta$ -barrel  
727 proteins. *Proceedings of the National Academy of Sciences of the United States of America*, **111**(41),  
728 E4350–E4358.
- 729 18. Koontz L. (2014). TCA precipitation. *Methods in enzymology*, **541**, 3–10.

- 730 19. Laloux, G., & Collet, J. F. (2017). Major Tom to Ground Control: How Lipoproteins Communicate  
731 Extracytoplasmic Stress to the Decision Center of the Cell. *Journal of bacteriology*, **199**(21), e00216-  
732 17.
- 733 20. Liu, H., & Naismith, J. H. (2008). An efficient one-step site-directed deletion, insertion, single and  
734 multiple-site plasmid mutagenesis protocol. *BMC biotechnology*, **8**, 91.
- 735 21. Mas, G., Thoma, J., & Hiller, S. (2019). The Periplasmic Chaperones Skp and SurA. *Sub-cellular*  
736 *biochemistry*, *92*, 169–186.
- 737 22. Noinaj, N., Kuszak, A. J., Gumbart, J. C., Lukacik, P., Chang, H., Easley, N. C., Lithgow, T., &  
738 Buchanan, S. K. (2013). Structural insight into the biogenesis of  $\beta$ -barrel membrane  
739 proteins. *Nature*, **501**(7467), 385–390.
- 740 23. Norell, D. Heuck, A. Tran-Thi, T.A. Gotzke, H. Jacob-Dubuisson, F. Clausen, T. Daley, D. O. Braun,  
741 V. Muller, M & Fan, E (2014). Versatile in vitro system to study translocation and functional integration  
742 of bacterial outer membrane proteins. *Nat Commun* **5**.
- 743 24. Okuda, S. & Tokuda, H (2011). Lipoprotein Sorting in Bacteria. *Annual Review of Microbiology* **65**,  
744 239–259.
- 745 25. Pawelek, P. D., Croteau, N., Ng-Thow-Hing, C., Khursigara, C. M., Moiseeva, N., Allaire, M., &  
746 Coulton, J. W. (2006). Structure of TonB in complex with FhuA, E. coli outer membrane receptor.  
747 *Science* **312**, 1399–1402.
- 748 26. Roman-Hernandez, G., Peterson, J. H. & Bernstein, H. D (2011). Reconstitution of bacterial  
749 autotransporter assembly using purified components. *eLife Sciences* **3**, e04234.
- 750 27. Schlegel, S., Rujas, E., Ytterberg, A. J., Zubarev, R. A., Luirink, J., & de Gier, J. W. (2013). Optimizing  
751 heterologous protein production in the periplasm of E. coli by regulating gene expression  
752 levels. *Microbial cell factories*, **12**, 24.
- 753 28. Schnell, D. J. & Hebert, D. N (2003). Protein Translocons: Multifunctional Mediators of Protein  
754 Translocation across Membranes. *Cell* **112**, 491–505.
- 755 29. Sherman, D. J., Xie, R., Taylor, R. J., George, A. H., Okuda, S., Foster, P. J., Needleman, D. J., &  
756 Kahne, D. (2018). Lipopolysaccharide is transported to the cell surface by a membrane-to-membrane  
757 protein bridge. *Science* **359**, 798–801.
- 758 30. Sit, B., Crowley, S. M., Bhullar, K., Lai, C. C., Tang, C., Hooda, Y., Calmettes, C., Khambati, H., Ma,  
759 C., Brumell, J. H., Schryvers, A. B., Vallance, B. A., & Moraes, T. F. (2015). Active Transport of

- 760 Phosphorylated Carbohydrates Promotes Intestinal Colonization and Transmission of a Bacterial  
761 Pathogen. *PLoS pathogens*, **11**(8), e1005107.
- 762 31. Sklar, J. G., Wu, T., Kahne, D., & Silhavy, T. J. (2007). Defining the roles of the periplasmic  
763 chaperones SurA, Skp, and DegP in Escherichia coli. *Genes & development*, **21**(19), 2473–2484.
- 764 32. Stubenrauch, C., Belousoff, M. J., Hay, I. D., Shen, H. H., Lillington, J., Tuck, K. L., Peters, K. M.,  
765 Phan, M. D., Lo, A. W., Schembri, M. A., Strugnelli, R. A., Waksman, G., & Lithgow, T. (2016).  
766 Effective assembly of fimbriae in Escherichia coli depends on the translocation assembly module  
767 nanomachine. *Nature microbiology*, **1**(7), 16064.
- 768 33. Studier F. W. (2005). Protein production by auto-induction in high density shaking cultures. *Protein*  
769 *expression and purification*, **41**(1), 207–234.
- 770 34. Szewczyk, J. & Collet, J.-F (2016). Chapter One - The Journey of Lipoproteins Through the Cell: One  
771 Birthplace, Multiple Destinations. *Advances in Microbial Physiology* (ed. Poole, R. K.) **69**, 1–50.
- 772 35. Tajima, T., Yokota, N., Matsuyama, S. & Tokuda, H (1998). Genetic analyses of the in vivo function of  
773 LolA, a periplasmic chaperone involved in the outer membrane localization of Escherichia coli  
774 lipoproteins. *FEBS Letters* **439**, 51–54.
- 775 36. Tsirigotaki, A., Geyter, J. D., Šoštaric', N., Economou, A. & Karamanou, S (2017). Protein export  
776 through the bacterial Sec pathway. *Nature Reviews Microbiology* **15**, 21–36.
- 777 37. van den Ent, F., & Löwe, J. (2006). RF cloning: a restriction-free method for inserting target genes  
778 into plasmids. *Journal of biochemical and biophysical methods*, **67**(1), 67–74.
- 779 38. Volokhina, E. B., Grijpstra, J., Stork, M., Schilders, I., Tommassen, J., & Bos, M. P. (2011). Role of  
780 the periplasmic chaperones Skp, SurA, and DegQ in outer membrane protein biogenesis in Neisseria  
781 meningitidis. *Journal of bacteriology*, **193**(7), 1612–1621.
- 782 39. Wagner, S., Klepsch, M. M., Schlegel, S., Appel, A., Draheim, R., Tarry, M., Högbom, M., van Wijk, K.  
783 J., Slotboom, D. J., Persson, J. O., & de Gier, J. W. (2008). Tuning Escherichia coli for membrane  
784 protein overexpression. *Proceedings of the National Academy of Sciences of the United States of*  
785 *America*, **105**(38), 14371–14376.
- 786 40. Walter, P. & Lingappa, V. R (1986). Mechanism of Protein Translocation Across the Endoplasmic  
787 Reticulum Membrane. *Annual Review of Cell Biology* **2**, 499–516.
- 788 41. Walton, T. A., Sandoval, C. M., Fowler, C. A., Pardi, A., & Sousa, M. C. (2009). The cavity-chaperone  
789 Skp protects its substrate from aggregation but allows independent folding of substrate domains.



- 790 *Proceedings of the National Academy of Sciences of the United States of America*, 106(6), 1772–  
791 1777.
- 792 42. Webb, C. T., Selkrig, J., Perry, A. J., Noinaj, N., Buchanan, S. K., & Lithgow, T. (2012). Dynamic  
793 association of BAM complex modules includes surface exposure of the lipoprotein BamC. *Journal of*  
794 *molecular biology*, **422**(4), 545–555.
- 795 43. Wilson, M. M. & Bernstein, H. D (2016). Surface-Exposed Lipoproteins: An Emerging Secretion  
796 Phenomenon in Gram-Negative Bacteria. *Trends in Microbiology* **24**, 198–208.
- 797 44. Wong, C. T., Xu, Y., Gupta, A., Garnett, J. A., Matthews, S. J., & Hare, S. A. (2015). Structural  
798 analysis of haemoglobin binding by HpuA from the Neisseriaceae family. *Nature communications*, **6**,  
799 10172.
- 800 45. Wu, S., Avila-Sakar, A., Kim, J., Booth, D. S., Greenberg, C. H., Rossi, A., Liao, M., Li, X., Alian, A.,  
801 Griner, S. L., Juge, N., Yu, Y., Mergel, C. M., Chaparro-Riggers, J., Strop, P., Tampé, R., Edwards, R.  
802 H., Stroud, R. M., Craik, C. S., & Cheng, Y. (2012). Fabs enable single particle cryoEM studies of  
803 small proteins. *Structure*, **20**(4), 582–592.
- 804 46. Yan, Z., Hussain, S., Wang, X., Bernstein, H.D. and Bardwell, J.C.A. (2019), Chaperone OsmY  
805 facilitates the biogenesis of a major family of autotransporters. *Mol Microbiol*, **112**: 1373-1387.
- 806 47. Zückert, W. R (2014). Secretion of Bacterial Lipoproteins: Through the Cytoplasmic Membrane, the  
807 Periplasm and Beyond. *Biochim Biophys Acta* **1843**, 1509–1516.

808

809

810

811

812

813

814

815

816

817

818

819

## 820 **Acknowledgments**

821 OmpA antibodies were obtained from Dr. Jan Willem deGier, Stockholm University.  
822 Plasmid for expression of the Bam complex (BamA-E) was obtained from Dr. Harris  
823 Bernstein at the NIH. Mr. Ashutosh Gupta, Andrew Judd and River Jiang helped in  
824 development of the purification protocol for Slams. Funding for this study was obtained  
825 from the Canadian Institutes of Health Research (CIHR PJT-148795).

826

## 827 **Author contributions**

828 TFM, SMH and YH designed and conceptualized the study. SMH, YH and RL and did  
829 the all the protein purification and liposome experiments. SMH and CCLL cloned the  
830 various constructs used in the study. MJ worked on protein purification and structural  
831 analysis. SMH, YH, and TFM wrote the manuscript and prepared the figures.

832

## 833 **Competing interests**

834 TFM, CCLL and YH are co-authors on a patent, "Slam polynucleotides and polypeptides  
835 and uses thereof".

836

## 837 **Materials and Correspondence**

838 All data is available in the main text or the supplementary materials. Correspondence  
839 and requests for materials should be addressed to [trevor.moraes@utoronto.ca](mailto:trevor.moraes@utoronto.ca).

840

841

842 **Figures and Table:**

843

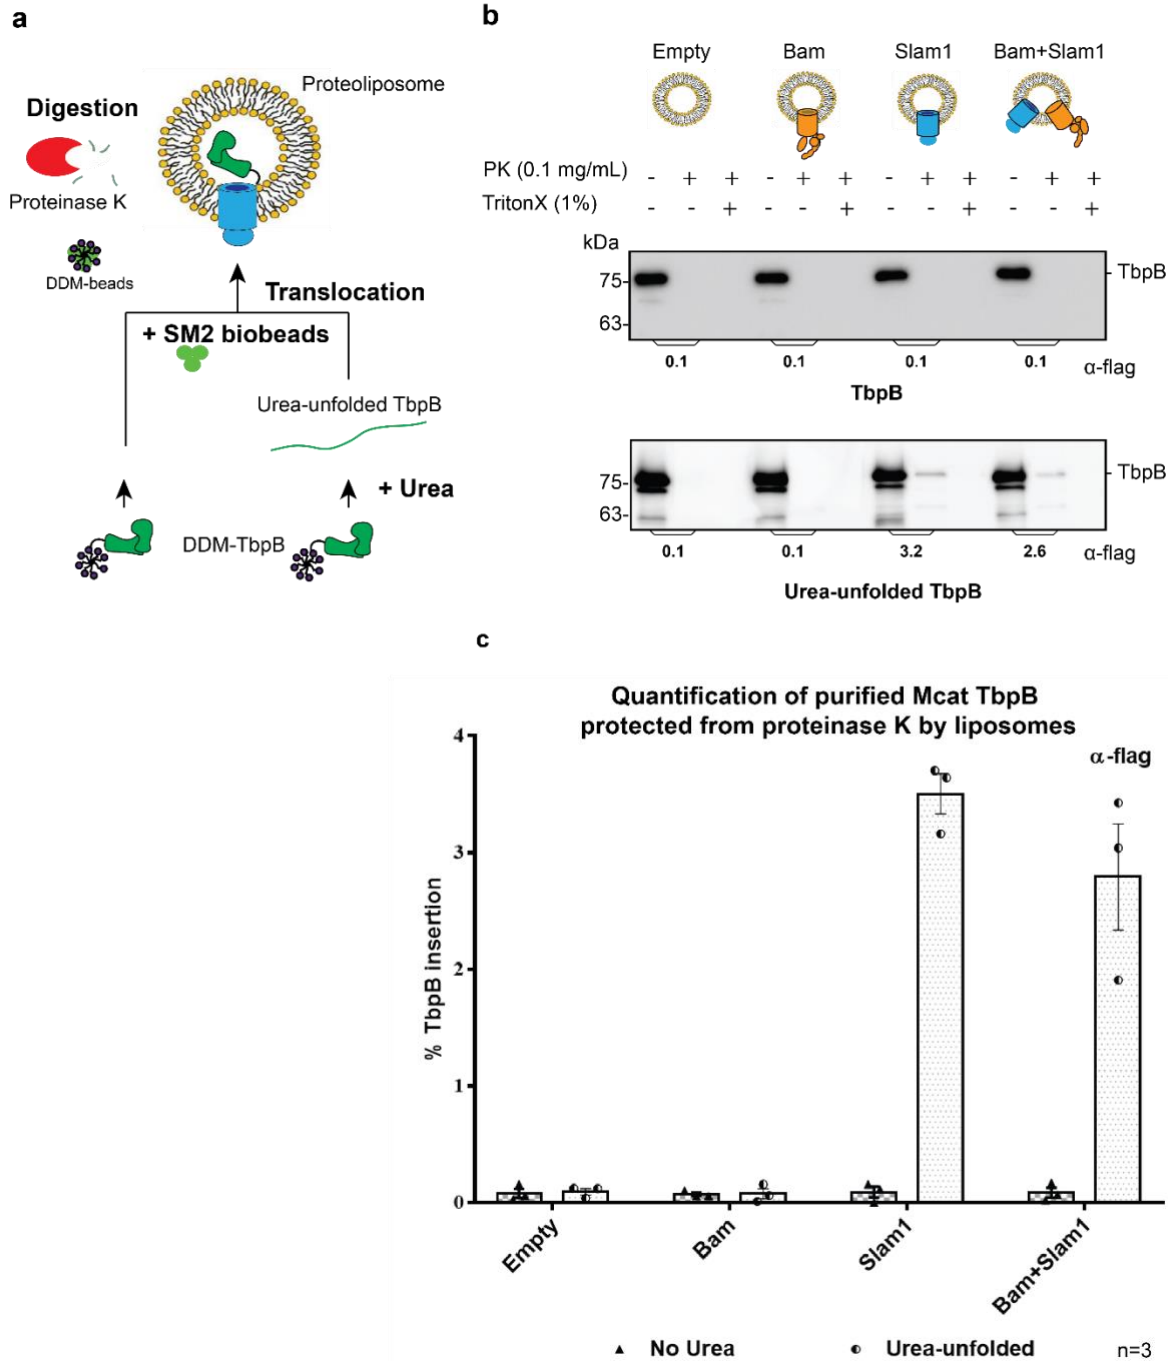

844

845 **Figure 1: Slam1 is necessary for the translocation of unfolded TbpB.** a) Model of a  
 846 defined *in vitro* assay for TbpB translocation. *M. catarrhalis* TbpB (folded and urea-  
 847 unfolded) is translocated inside Slam1 containing proteoliposomes. Efficiency was  
 848 calculated based on percentage of TbpB that was protected from proteinase K. b)

849 Representative proteinase K protection assay results obtained for Slam1 or Slam1+Bam  
850 incubated with purified TbpB (folded or kept unfolded by 8M Urea). Proteoliposomes  
851 containing Empty or Bam were used as controls. Each sample was treated with PK or  
852 PK + Triton X-100 and examined by western blot.  $\alpha$ -TbpB antibody western blots were  
853 used to quantify the amount of TbpB. **c)** Quantification of TbpB protection in  
854 proteoliposomes through densitometry analysis. The % TbpB protection was calculated  
855 by dividing the +PK by input sample. The plot contains results obtained from three  
856 biological replicates. Individual data points were included on the graph

857

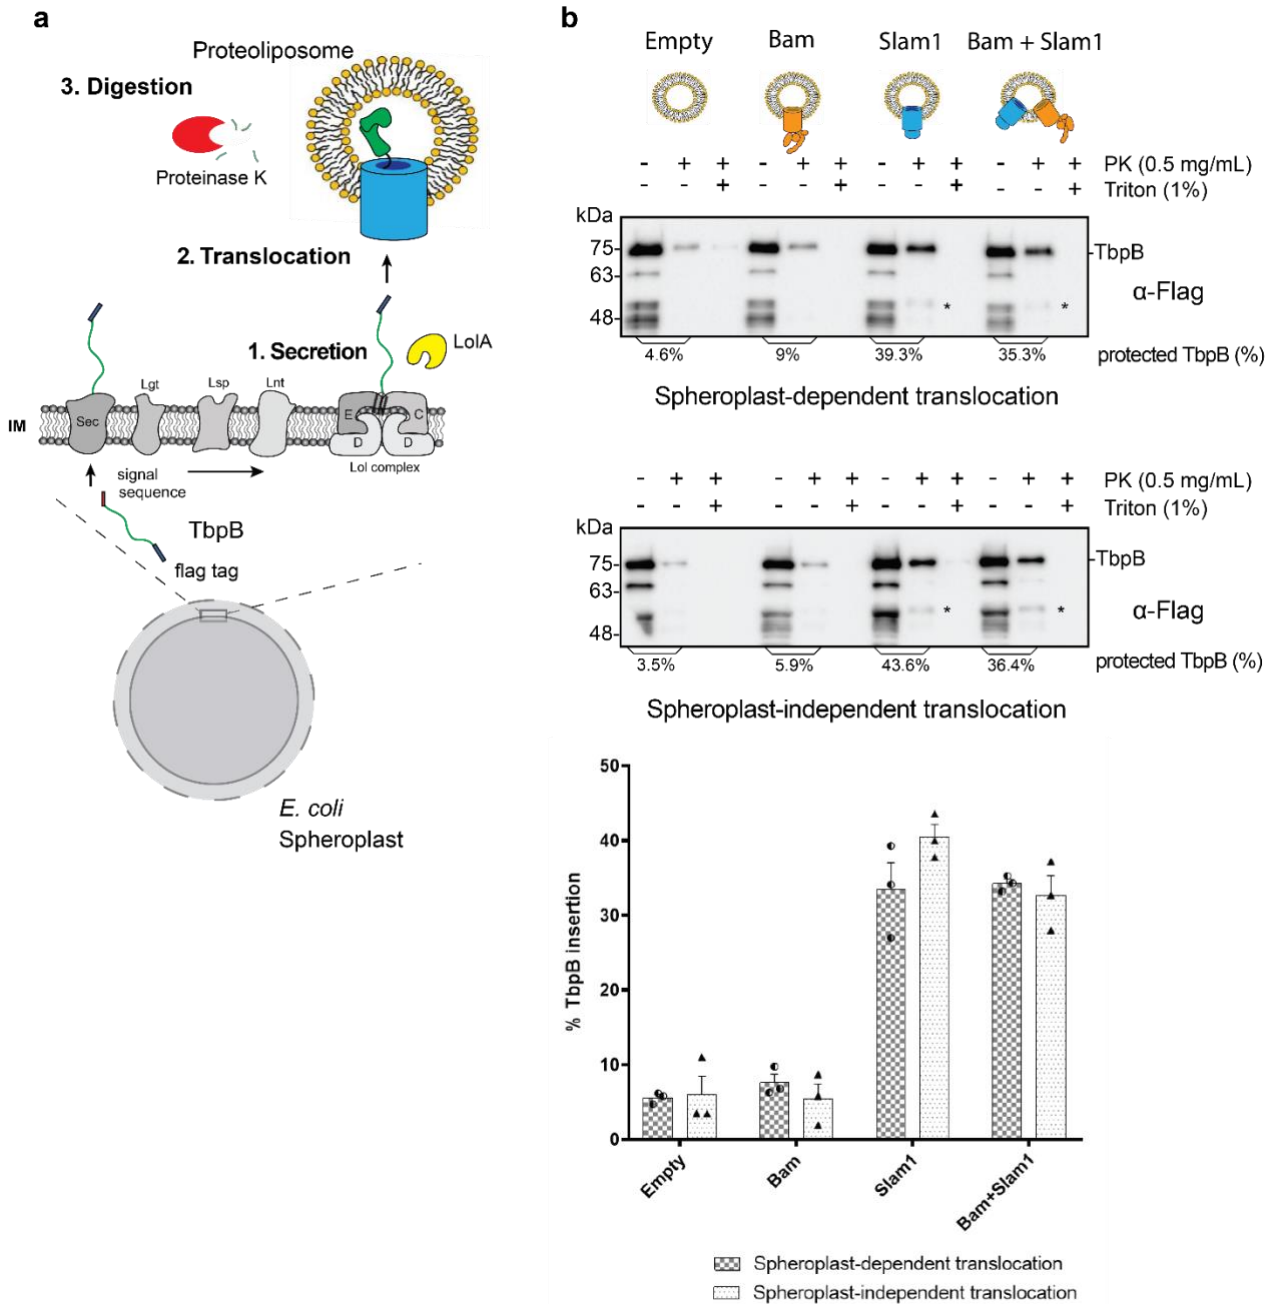

858

859 **Figure 2: *In vitro* translocation assay for reconstitution of Slam-dependent SLP**

860 **translocation. a)** Model of the proposed *in vitro* proteoliposome translocation assay for

861 TbpB secreted directly from *E. coli* spheroplast. **b)** Representative  $\alpha$ -flag western blots

862 obtained for the *in vitro* translocation assay. Slam1 proteoliposomes were incubated

863 either with spheroplasts expressing TbpB (spheroplast-dependent translocation, upper

864 panel) or supernatant of spheroplasts that have been induced for TbpB production

865 (spheroplast-independent translocation, lower panel). Empty liposomes and Bam  
866 proteoliposomes were used as controls. Proteoliposomes containing Bam + Slam1 were  
867 used to test if the Bam complex plays an accessory role to Slam in TbpB translocation.  
868 For each proteoliposome, no proteinase K treatment (- PK), proteinase K treatment  
869 (+PK) and proteinase K + TritonX-100 treatment (+PK+T) samples are shown. The %  
870 TbpB protection shown was calculated by dividing the intensity of the mature TbpB band  
871 (~75 kDa) for each sample by the -PK sample. (\*) - partial TbpB fragment which is only  
872 seen in the presence of Slam1 proteoliposomes. **c)** Quantification of TbpB protection in  
873 proteoliposomes through densitometry analysis. The plot represents data obtained from  
874 at least three biological replicates for both spheroplast-dependent translocation and  
875 spheroplast-independent assay . Individual data points were included on the graph.

876 **Table 1: Summary of mass spectrometry result:**

|   | AfuA     |                |            |          | TbpB     |                |            |          |
|---|----------|----------------|------------|----------|----------|----------------|------------|----------|
|   | Proteins | Total peptides | % Coverage | Location | Proteins | Total peptides | % Coverage | Location |
| 1 | AfuA     | 380            | 78%        | P        | TbpB     | 265            | 31%        | -        |
| 2 | TufA     | 119            | 70%        | IM       | LolA     | 146            | 73%        | P        |
| 3 | LolA     | 36             | 72%        | P        | TufA     | 57             | 59%        | IM       |
| 4 | OmpF     | 12             | 34%        | OM       | OmpF     | 21             | 38%        | OM       |
| 5 | DegP     | 10             | 30%        | P        | DegP     | 15             | 32%        | P        |
| 6 | FlgH     | 12             | 34%        | P        | OmpA     | 15             | 34%        | OM       |
| 7 | DegQ     | 6              | 14%        | P        | Skp      | 9              | 27%        | P        |
| 8 | OmpA     | 5              | 22%        | OM       | FlgH     | 8              | 26%        | P        |
| 9 |          |                |            |          | DegQ     | 5              | 13%        | P        |

877

878 Pulldown samples were left on beads, digested with trypsin and analyzed by mass  
879 spectrometry. Data analysis was done by Scaffold 4 software. Cytoplasmic  
880 contaminations and proteins that have less than 5 total spectrums count were excluded  
881 from the summary table. LolA was detected in both the negative control – AfuA and the  
882 protein of interest – TbpB. However, the amount of LolA in TbpB is 5 times higher than  
883 amount of LolA in AfuA sample. Skp is the only periplasmic protein that was present in  
884 TbpB sample but not AfuA sample, though there were only 9 total spectrum counts.  
885 DegP is another periplasmic chaperone that presented in both samples. However, it is  
886 known to function as a protease that controls the quantity of over expressed proteins in  
887 the periplasm.

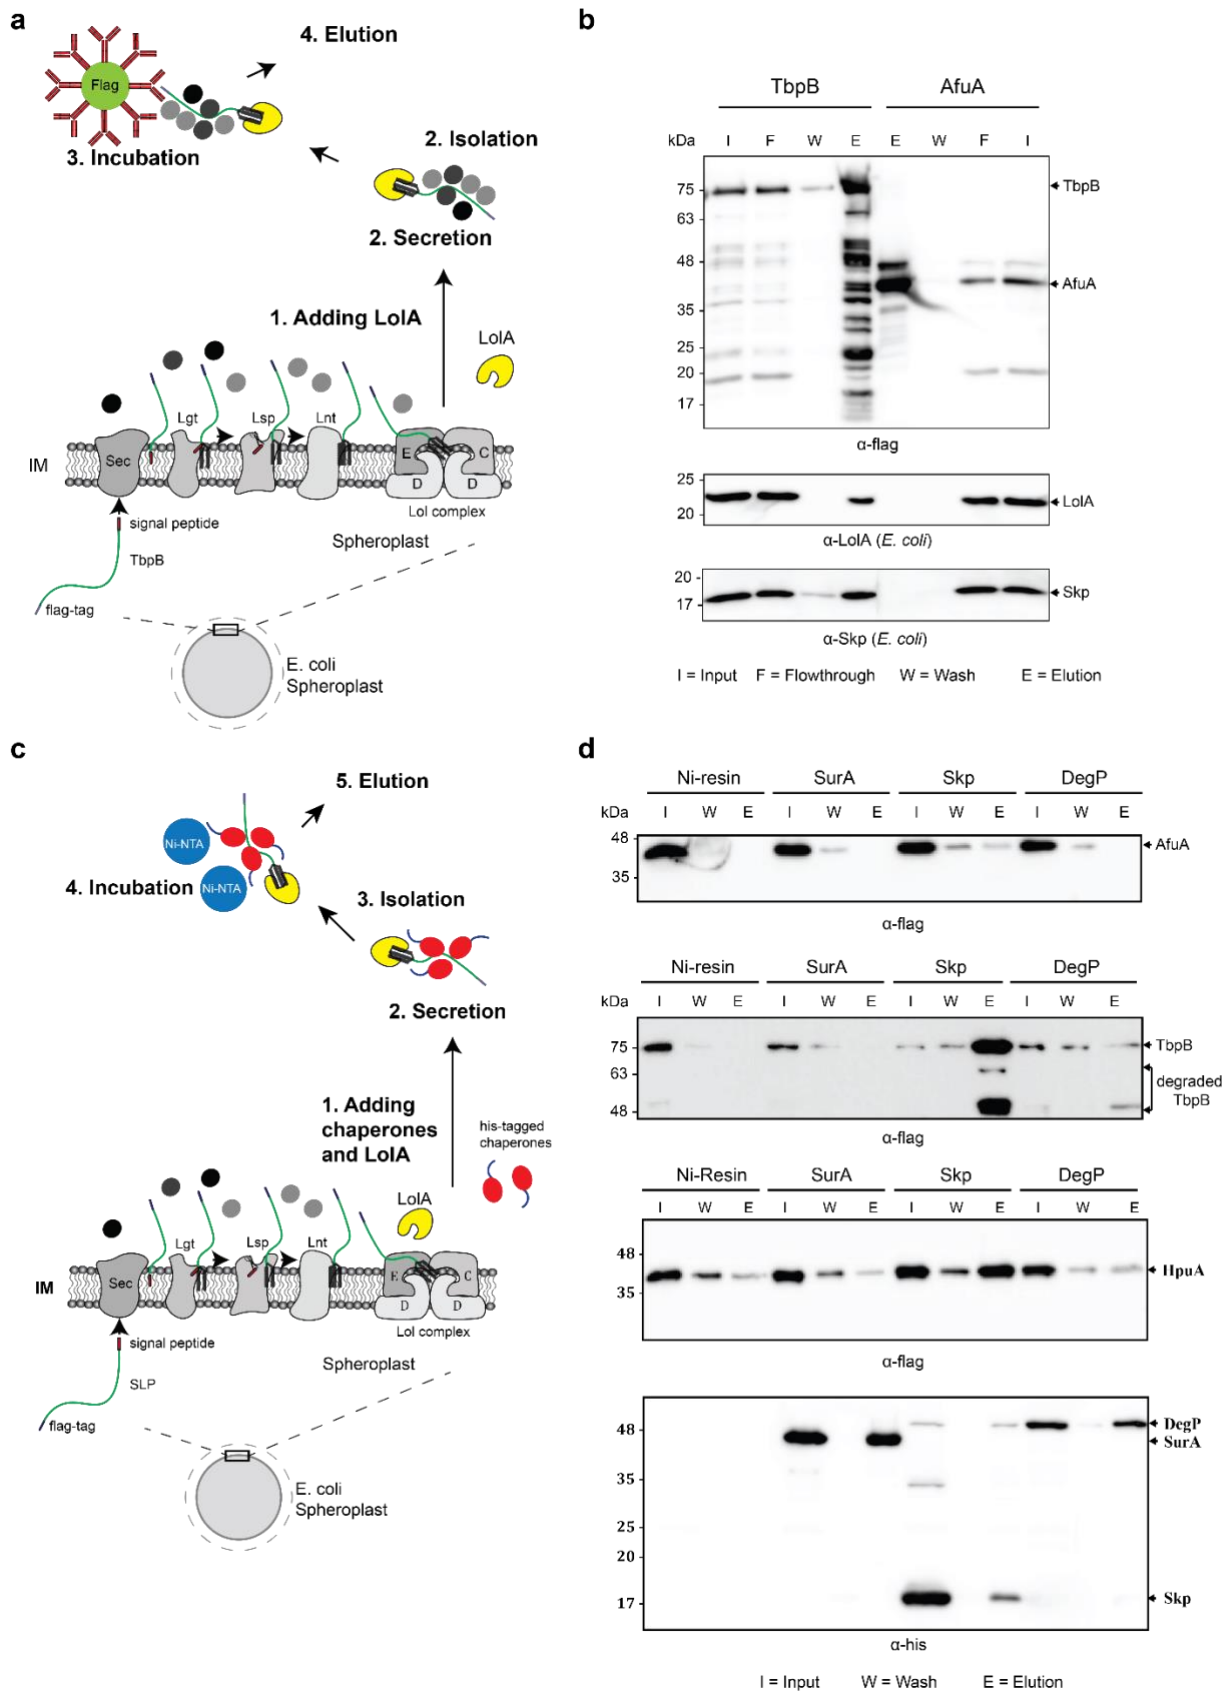

888

889 **Figure 3. Periplasmic chaperone Skp interacts with surface lipoproteins TbpB and**

890 **HpuA after being released from the inner membrane. a) Model of pulldown assay**



891 using the flag-tag on the C-terminus of TbpB. Samples were analyzed using mass  
892 spectrometry (summarized in table 1) and examined on western blots. **b)** Representative  
893 western blots for TbpB pulldown. LolA and periplasmic chaperone Skp were detected in  
894 the TbpB eluted fraction. **c)** Model of reciprocal pulldown assay using the his-tag on the  
895 N-terminus of chaperones. Purified his-tagged chaperones (SurA, Skp, DegP) were  
896 added to the spheroplast before the induced secretion of SLPs. **d)** Representative  
897 western blots of the reciprocal pulldown assay. Only periplasmic chaperone Skp (17kDa)  
898 was found to pulldown lipoprotein TbpB and HpuA. Note: Trimeric Skp and DegP have  
899 similar molecular weight at 54 kDa.

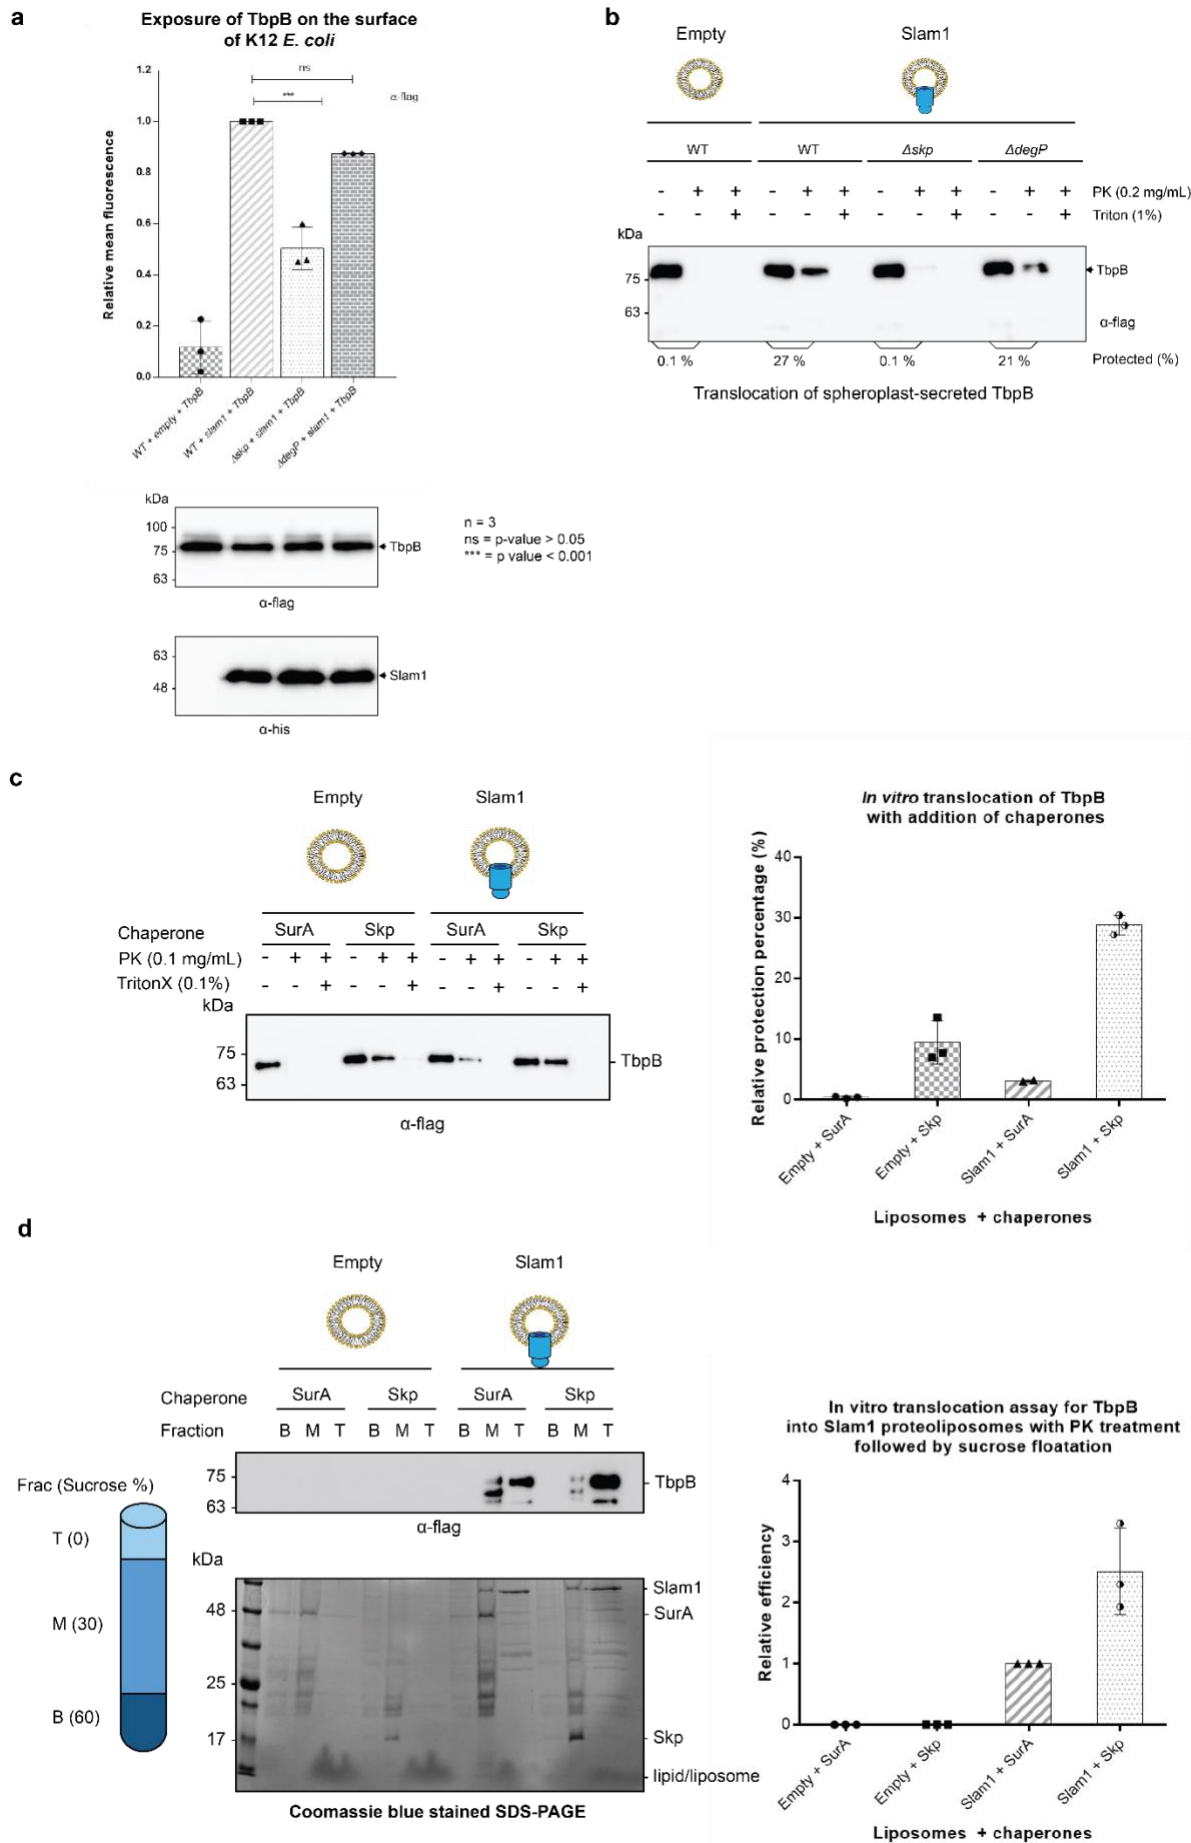

901 **Figure 4: Periplasmic chaperone Skp is required for Slam1-TbpB translocation in**  
902 **the reconstitution systems. a)** Translocation of TbpB via Slam1 to the surface of *E. coli*  
903 K12 mutants. Depletion of Skp significantly reduces the translocation of TbpB to the  
904 surface (by 50% - detecting by using  $\alpha$ -flag antibody). **b)** Representative western blot of  
905 the *in vitro* proteoliposome translocation for TbpB secreted from K12 *E. coli* spheroplast  
906 mutants. TbpB secreted from  $\Delta$ *skp* spheroplast fails to translocate into the Slam1  
907 proteoliposomes for protection against proteinase K. **c)** Representative western blot (left  
908 panel) and quantification (right panel) of the *in vitro* translocation of purified TbpB into  
909 Slam1 proteoliposomes in addition of purified chaperones. Full length lipidated TbpB was  
910 unfolded in urea followed by incubation with LolA and either SurA (negative control) or  
911 Skp before incubating with empty or Slam1 proteoliposomes and proteinase K digestion.  
912 TbpB-Skp complex provided extra protection for TbpB even in the absence of Slam1. **d)**  
913 Representative western blot (left panel) and quantification (right panel) of the protected  
914 TbpB by the liposomes which were isolated using sucrose flotation assay after  
915 proteinase K digestion. Translocation of TbpB into Slam1 proteoliposomes increased by  
916 2.5 folds in the presence of Skp in comparison with the Slam1 proteoliposomes + SurA  
917 (positive control). Results are from at least 3 biological replicates. Individual data points  
918 were included on the graph.

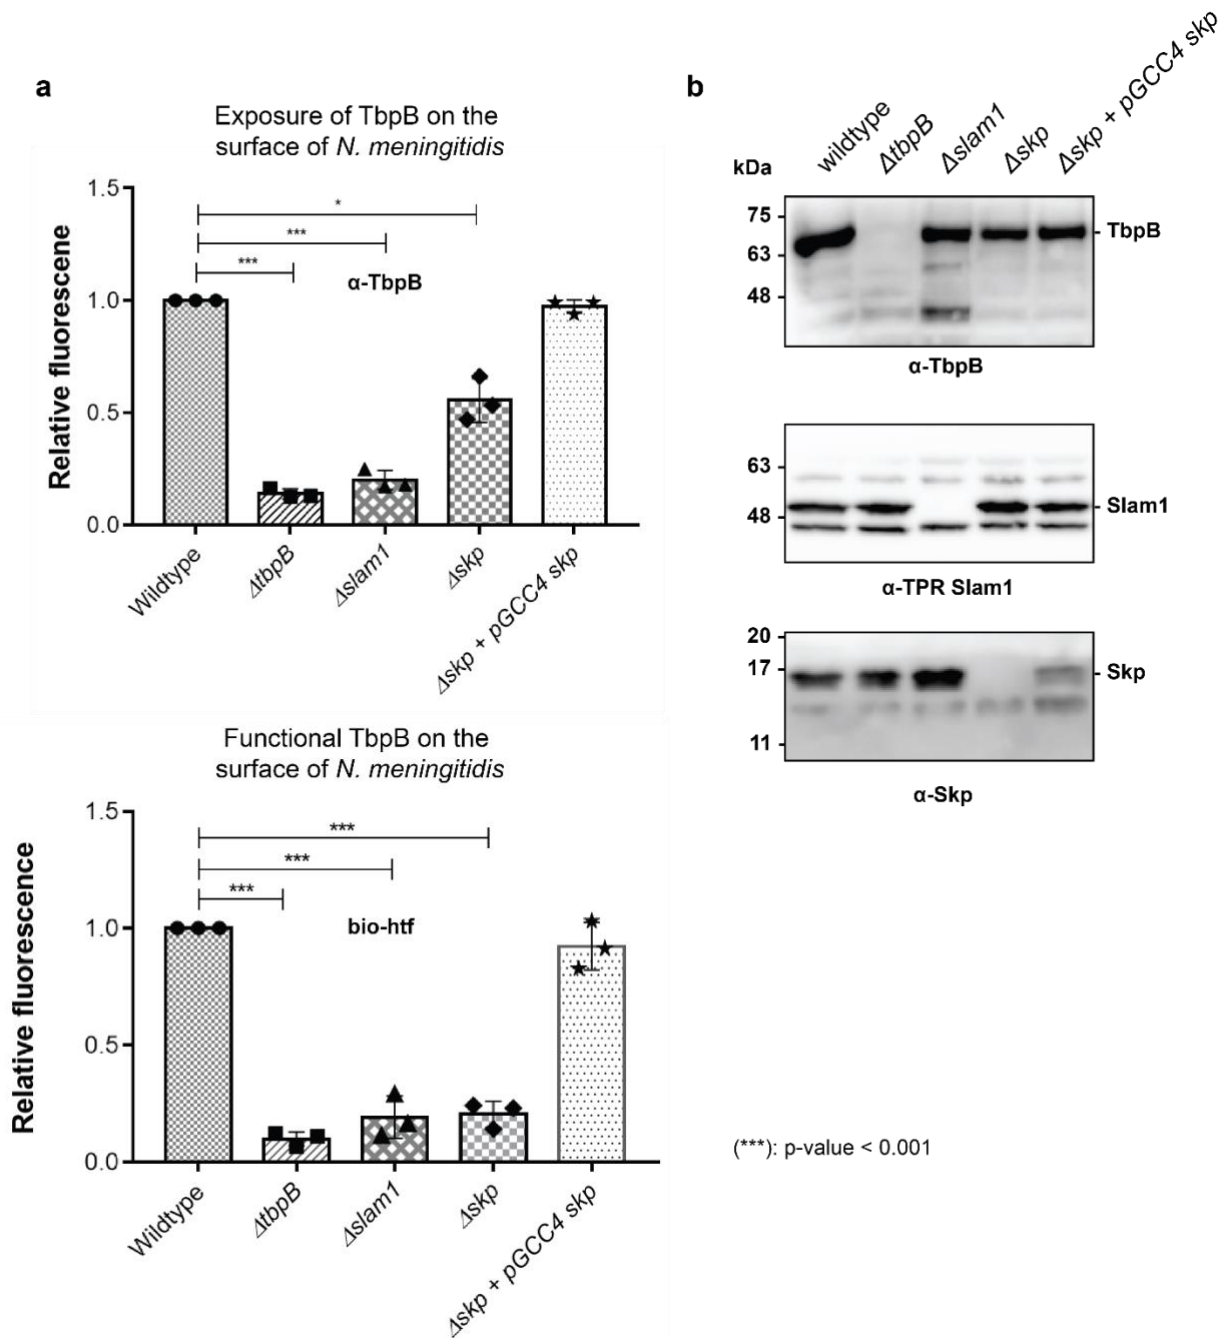

919

920

921

922

923

924

925

**Figure 5. Periplasmic chaperone Skp is important for translocation of TbpB to the surface of *N. meningitidis*.** **a)** Relative fluorescence intensity accessing the presence of TbpB (65 kDa) on the surface of *N. meningitidis* mutants using anti-TbpB antibody (exposure - top) and biotinylated human transferrin (functional - bottom). Individual data points were included on the graph. Depletion of *skp* decreased surface exposed TbpB by 50% and the translocated TbpB is non-functional (not binding to biotinylated human

926 transferrin). Complementation of Skp from pGCC4 vector and 1mM IPTG successfully  
927 restored the translocation of TbpB and its function. **b)** Representative western blots to  
928 access the expression of TbpB, Slam1 and Skp in the *N. meningitidis* strains examined.  
929 Depletion of Skp did not affect the expression of OMP Slam1 or TbpB (induced by  
930 0.1mM deferoxamine). Fluorescent assays results are combined from 3 biological  
931 replicates and statistically analyzed by one-way ANOVA test.

932 **Supplementary information**

933

934 **Supplementary Fig. 1-11:** Supplementary figures

935 **Supplementary Table 1:** List of materials and reagents used in the study

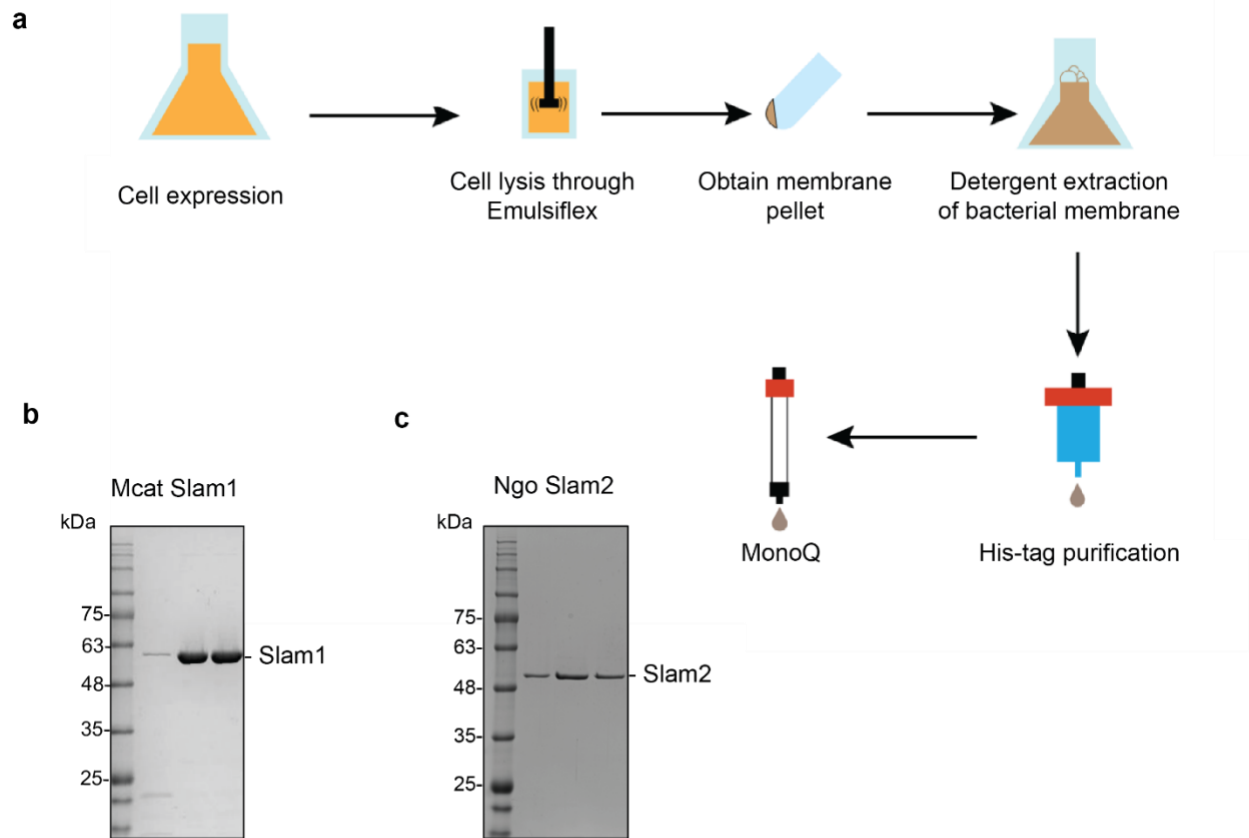

936

937 **Supplementary Fig. 1. Purification of *M. catarrhalis* Slam1 and *N. gonorrhoeae***

938 **Slam2.** **a)** Overall membrane protein expression and purification pipeline. **b)** SDS-

939 PAGE gels of pure MonoQ fractions from Mcat Slam1 purification. Pure Slam-DDM

940 detergent complex eluted at 60 mM NaCl from a MonoQ column. These were used for

941 the downstream functional assays.

942

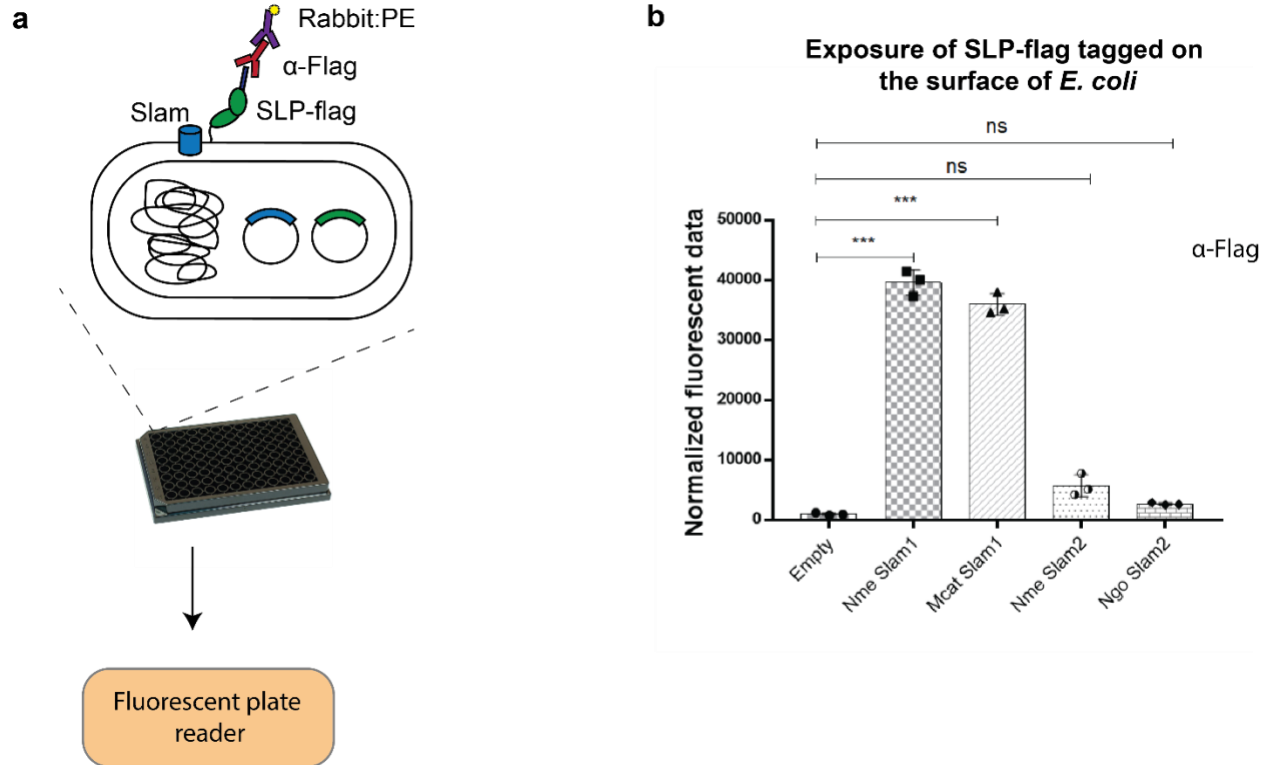

943

944 **Supplementary Fig. 2. Translocation of Mcat TbpB to the surface of *E. coli* cells.**

945 **a)** Plate reader assay was used to examine the function of Slam homologs. Slams and  
946 TbpB were co-expressed in *E. coli* strain C43(DE3) and probed with  $\alpha$ -Flag antibodies  
947 followed by labelling with secondary antibody conjugated with fluorescent probe  
948 phycoerthyrin (PE). The fluorescence was quantified using a plate reader. **b)**

949 Quantification of surface display of Mcat TbpB by Slam1 and Slam2 homologs (negative  
950 controls). Normalized fluorescence values obtained for each of the Slam homologs is  
951 shown. The results represent at least three biological replicates and demonstrate that  
952 Mcat Slam1 is functional in translocating TbpB in *E. coli* model. The results also confirm  
953 that *E. coli* components are sufficient in reconstituting Slam1-dependent translocation  
954 for TbpB.



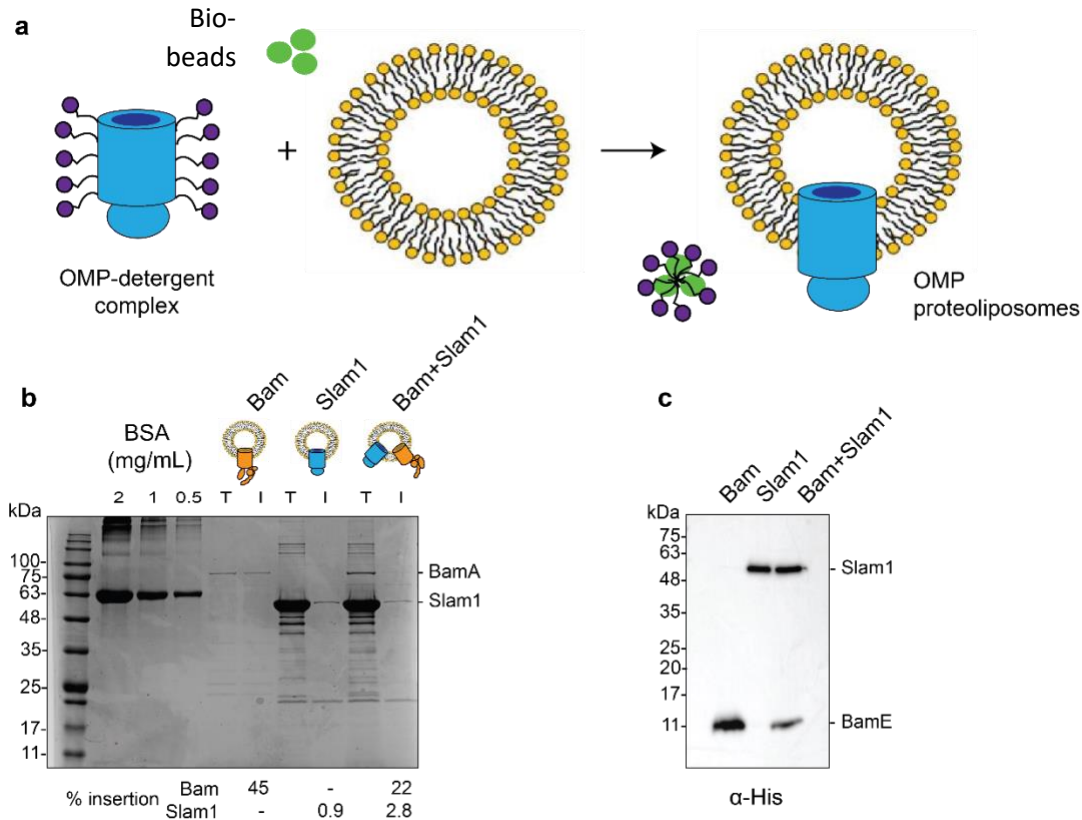

955

956 **Supplementary Fig. 3. Generation of Slam1 and Bam proteoliposomes. a)** Protocol

957 used for insertion of outer membrane proteins (OMP) into liposomes. OMP-DDM

958 protein-detergent complexes were diluted (below the critical micellar concentration

959 (CMC) of DDM) into preformed liposomes. Detergent was further removed using SM2

960 BioBeads. **b)** Quantification of Slam1 and BamABCDE insertion using Coomassie

961 staining. BSA was used as a control for estimating absolute protein quantity. Insertion

962 percentages were calculated by dividing the band intensity of protein inserted in

963 liposomes (I) by total protein incubated with liposomes (T). For the Bam complex, BamA

964 intensity was used to calculate insertion efficiency. **c)** Confirmation of Slam1 and

965 BamABCDE insertion using western blots with  $\alpha$ -His antibodies.

966

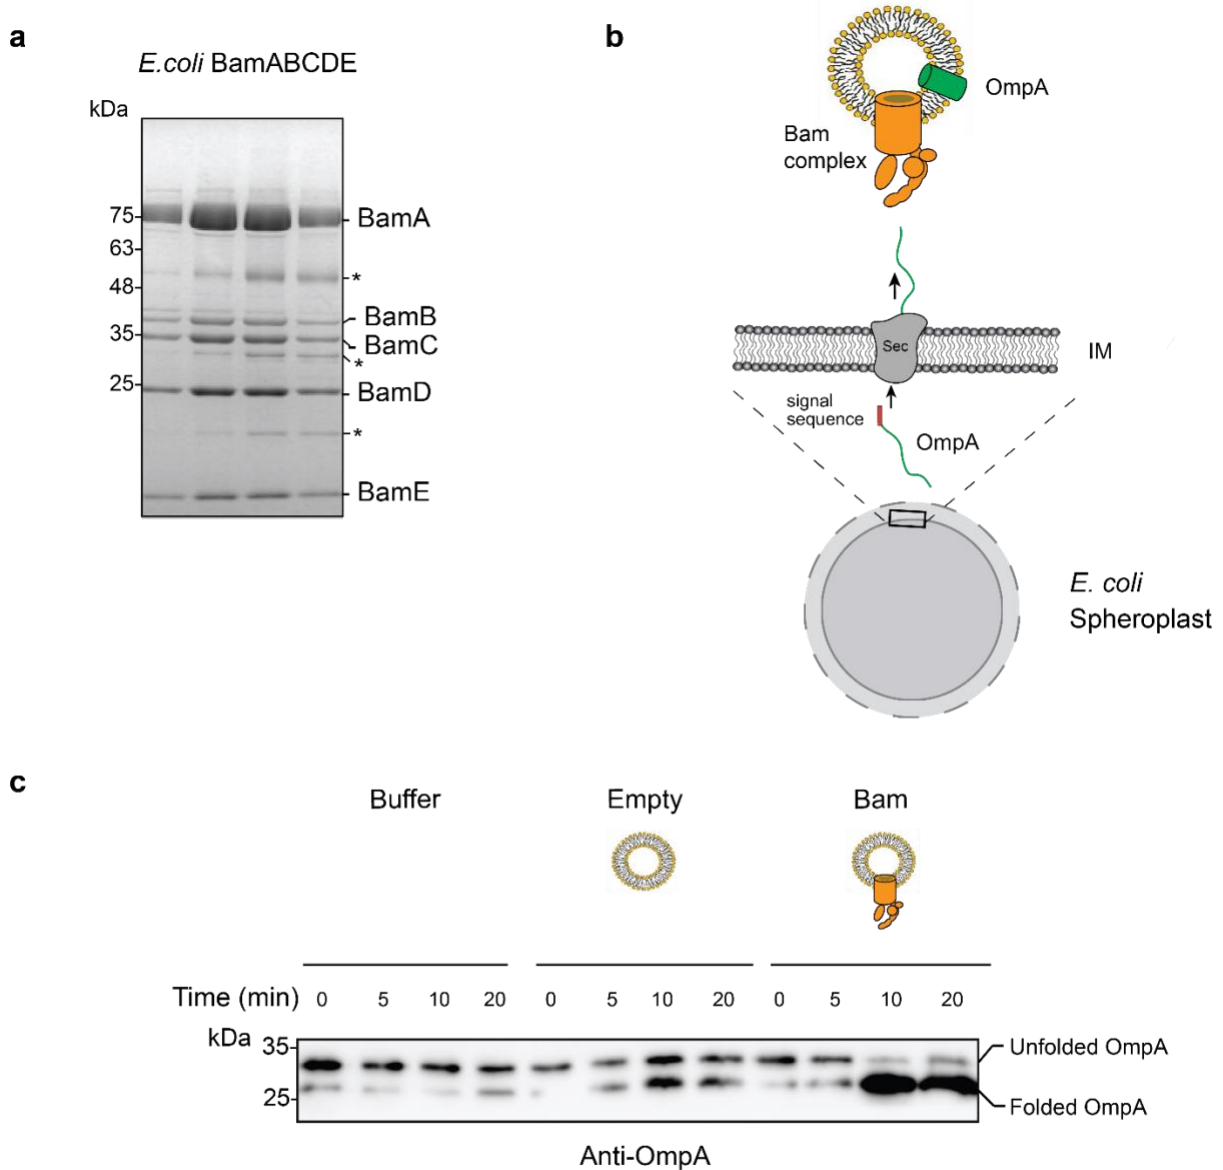

967

968 **Supplementary Fig. 4. Purification and characterization of *E. coli* Bam complex. a)**

969 BamABCDE fractions obtained from a S200 gel filtration column. The BamABCDE

970 complex was obtained using previously described protocols (Ref?). Some non-Bam

971 complex bands (marked in asterisk) were observed and they most likely correspond to

972 common *E. coli* proteins that have been reported in previous His-tag purified proteins.

973 **b)** Design of an in vitro translocation assay for testing the function of the Bam complex.

974 *E. coli* spheroplasts secrete porins such as OmpA into the supernatant. When incubated

975 with Bam complex proteoliposomes, secreted OmpA is successfully inserted into Bam

976 proteoliposomes. **c)** An  $\alpha$ -OmpA western blot to access the folding states of secreted

977 OmpA over time in Tris pH 8 buffer, empty liposome and Bam proteoliposome.

978 Approximately 95% of OmpA achieved folded form in the presence of Bam

979 proteoliposome within the first 10 minutes of incubation while self-folding in empty

980 liposome remained at 50%.

981

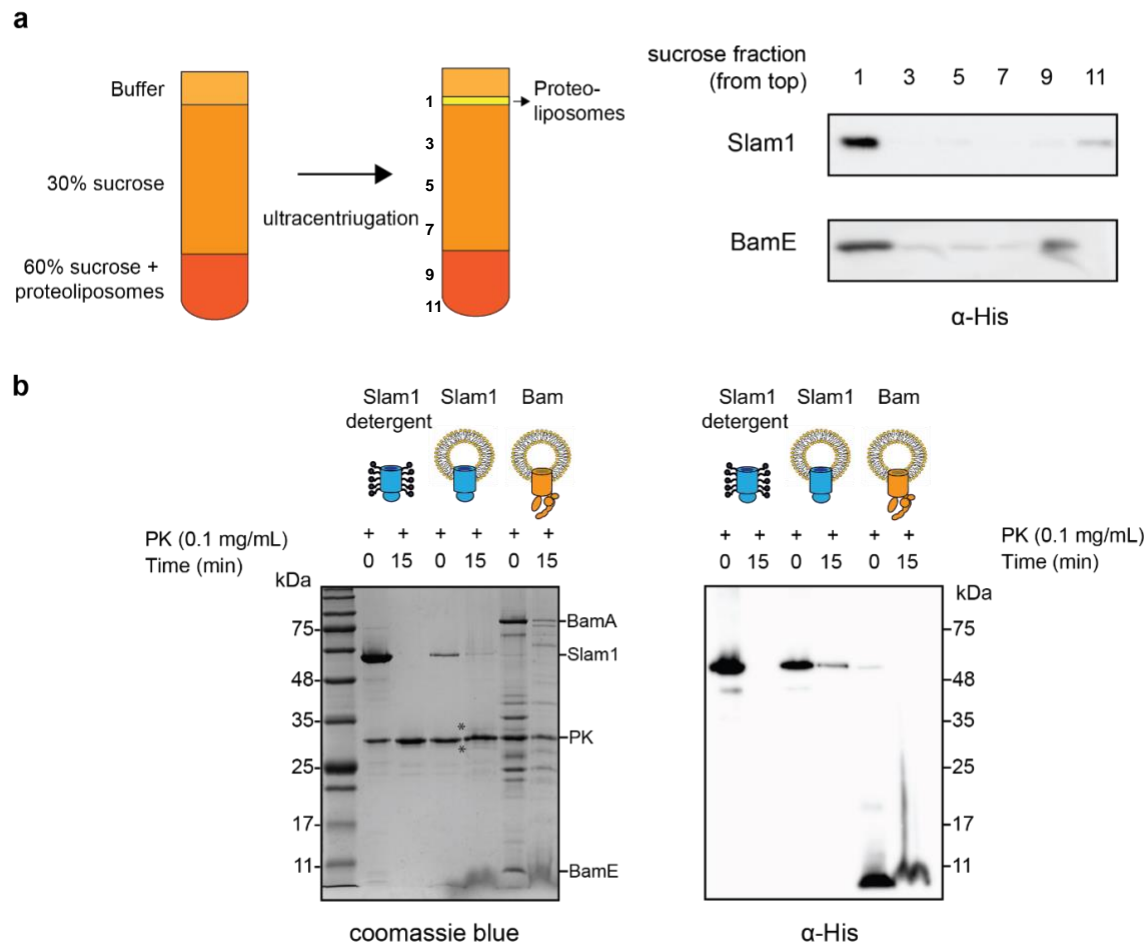

982

983 **Supplementary Fig. 5. Characterization of Mcat Slam1 and BamABCDE containing**

984 **proteoliposomes. a)** Sucrose floatation assay for Slam1 and Bam proteoliposomes.

985 Proteoliposomes were resuspended to a final concentration of 60% sucrose and

986 subsequently layered with 30% sucrose and buffer B. Ten fractions were collected from

987 the top and alternate fractions were run on an SDS-PAGE gel. Western blots using  $\alpha$ -

988 His antibodies are shown indicating the amount of protein present in each fraction. **b)**

989 Proteinase K protection assay on Slam1 and Bam proteoliposomes. Proteoliposomes

990 were incubated with 0.1 mg/ml proteinase K for 20 minutes at room temperature.

991 Coomassie blue stained gel and  $\alpha$ -His western blot were used to access orientation of  
992 the proteins in liposomes. Approximately 18% of Slam1 inserted with N-terminal his-tag  
993 residing in the lumen of liposomes and was protected from PK digestion. Percentage  
994 protection was calculated using densitometry. Asterisk (\*) indicates fragments of Slam1  
995 (potentially C-terminal barrel) remaining after PK shaving.

996

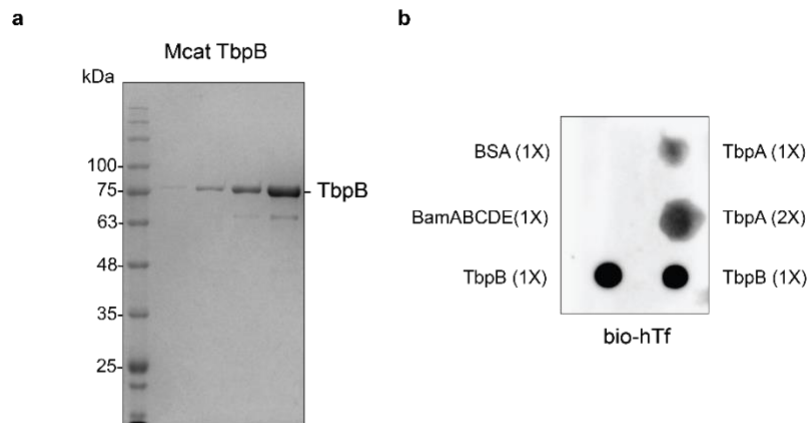

997

998 **Supplementary Fig. 6. Purification and functional characterization of *M.***

999 ***catarrhalis* TbpB. a)** Purified TbpB-DDM complexes obtained from a S200 size

1000 chromatography column. The sample was subsequently used for the *in vitro*

1001 translocation assay. **b)** Dot blot assay with biotinylated human transferrin (bio-hTf) for

1002 detecting the function of TbpB. 0.5  $\mu$ l TbpB and respective controls (TbpA, BamABCDE

1003 and BSA) were spotted on nitrocellulose membrane and blotted with bio-hTf (50  $\mu$ g/ml)

1004 followed by streptavidin-HRP. TbpB bound tightly with bio-hTf indicating it is functional.

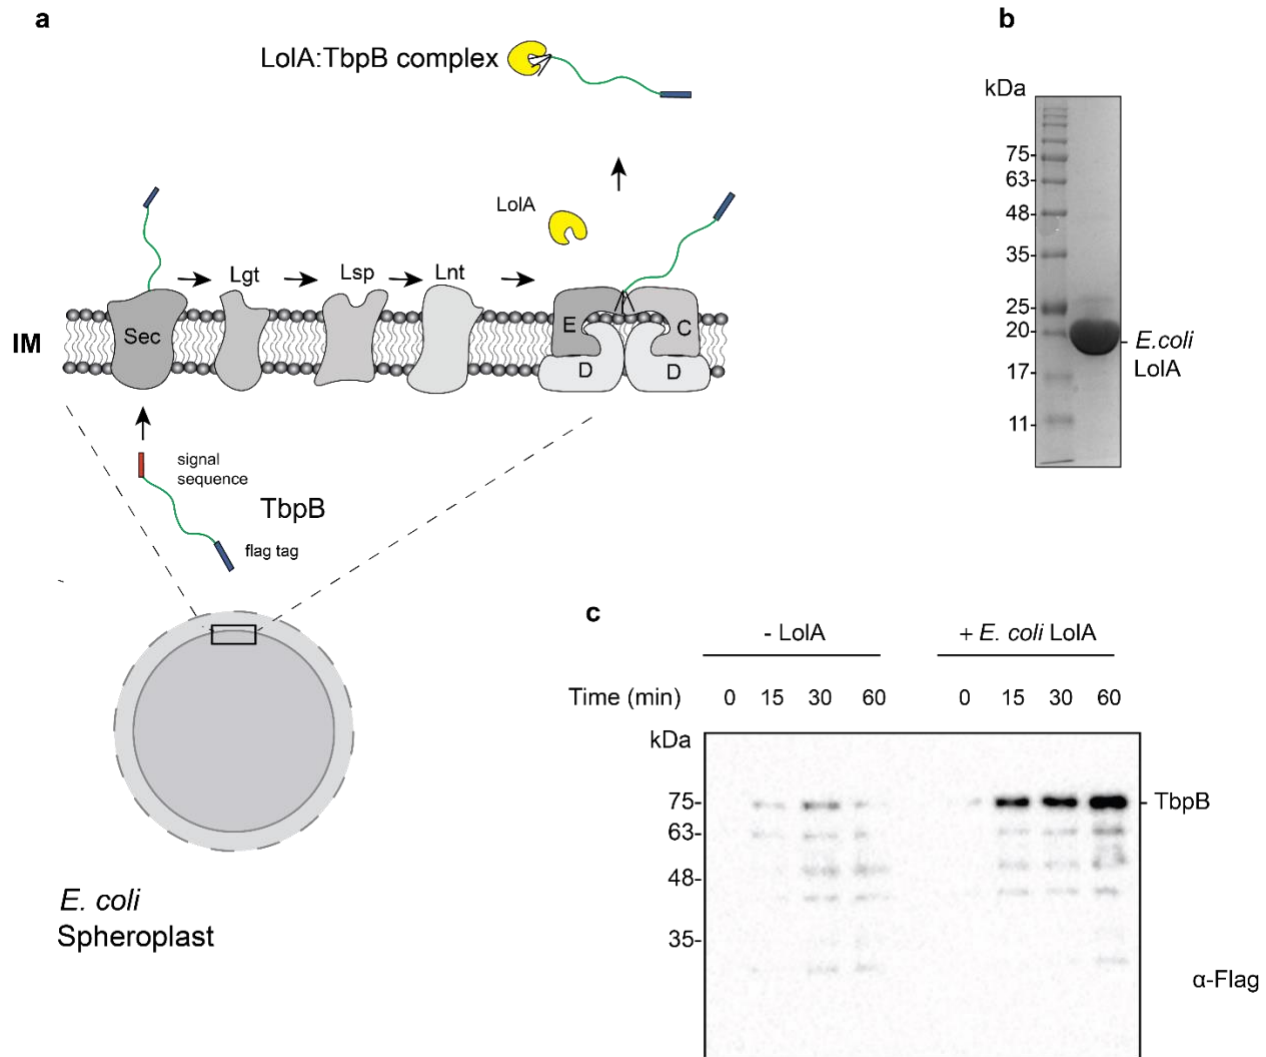

1005

1006 **Supplementary Fig. 7. Purification and functional characterization of LolA from *E.***

1007 ***coli.* a)** Model of the release of SLPs from spheroplasts upon addition of purified *E. coli*

1008 LolA. SLPs are synthesized in the cytoplasm and transported to the periplasm via the

1009 Sec translocon. After the addition of the lipid anchor, SLPs are transferred to the

1010 LolCDE complex and released into the periplasm by LolA. In spheroplasts, SLPs are

1011 released into the supernatant upon LolA addition. **b)** Uncut 6x-His tagged *E. coli* LolA

1012 (~22 kDa) after Ni-NTA affinity chromatography purification. **c)** Release of Mcat TbpB in

1013 the presence of purified LolA over time course of 60 minutes. *E. coli* cell pellets were

1014 converted into spheroplasts and induced for expression of TbpB in the presence or  
1015 absence of 10 $\mu$ M LolA. Samples were collected every 15 minutes, spun down at 13,500  
1016 rpm for 5 mins and the supernatants were loaded on SDS-PAGE. The amount of TbpB  
1017 (~ 75 kDa) that was released into the supernatant in the presence and absence of LolA  
1018 was accessed using a  $\alpha$ -Flag antibody western blot. Lower bands are degradation  
1019 product of TbpB which also increased over time.



**a**

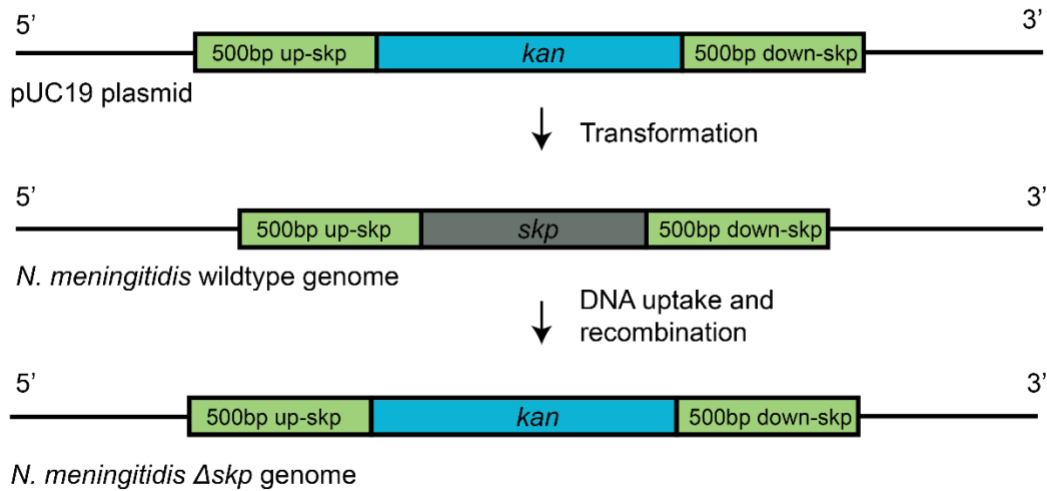

**b**

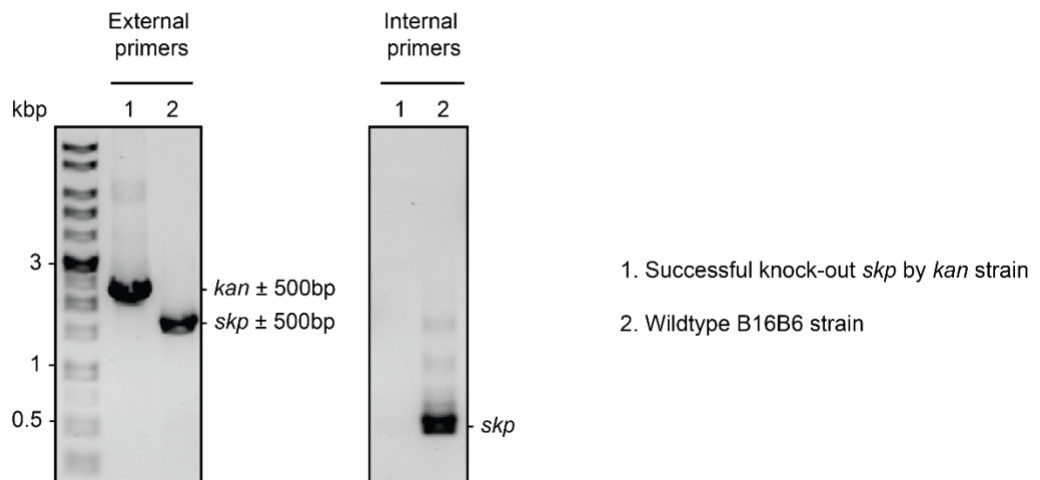

1020

1021 **Supplementary Fig. 8. Deletion of Skp in *N. meningitidis*.** a) The complete knock-out

1022 process using spot transformation. b) Agarose gel of single colony PCR using external

1023 primers (target 500bp up/down-*skp*) and internal primers (target internal of *skp* gene) to

1024 confirm the successful replacement of *kan* for *skp* gene.

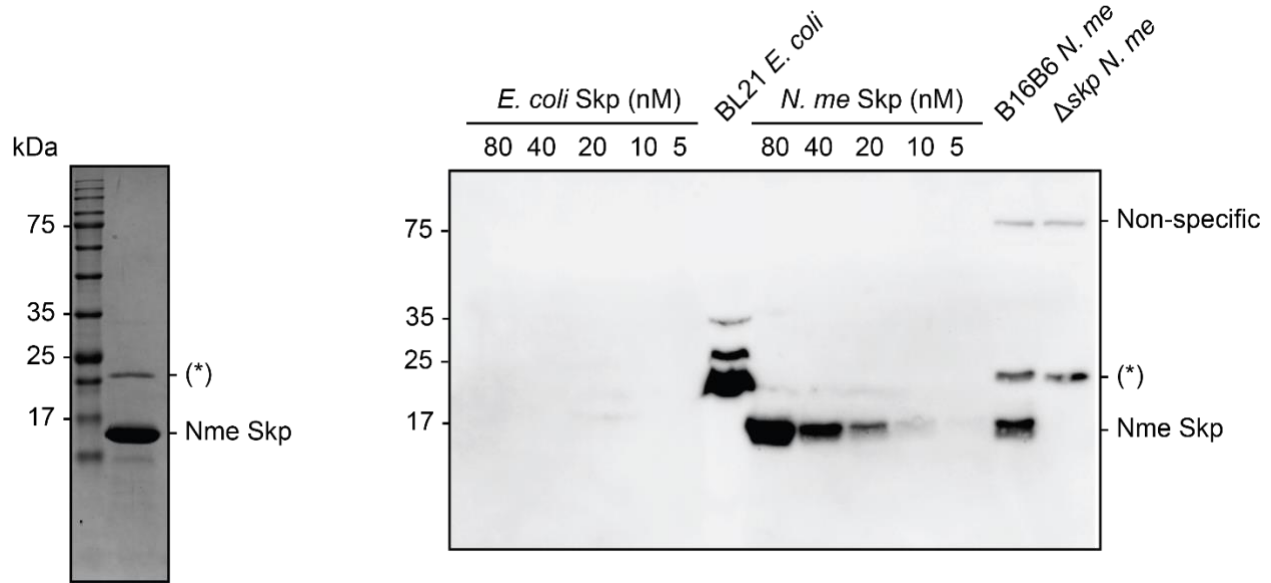

1025

1026 **Supplementary Fig. 9. Purification of Nme Skp for antibody production and**  
1027 **antibody test.** Coomassie blue stained SDS-PAGE of *Nme Skp* after S75 gel filtration  
1028 to access its purity prior to antibody production (left panel) and  $\alpha$ -Nme Skp antibody  
1029 western blot to validate the antibody and confirm the knock-out of Skp (17kDa) in  
1030 B16B6 *N. meningitidis* (right panel). (\*) is the contamination from BL21 *E. coli*. There is  
1031 no cross-reactivity of *Nme Skp* antibody with *E. coli* Skp.

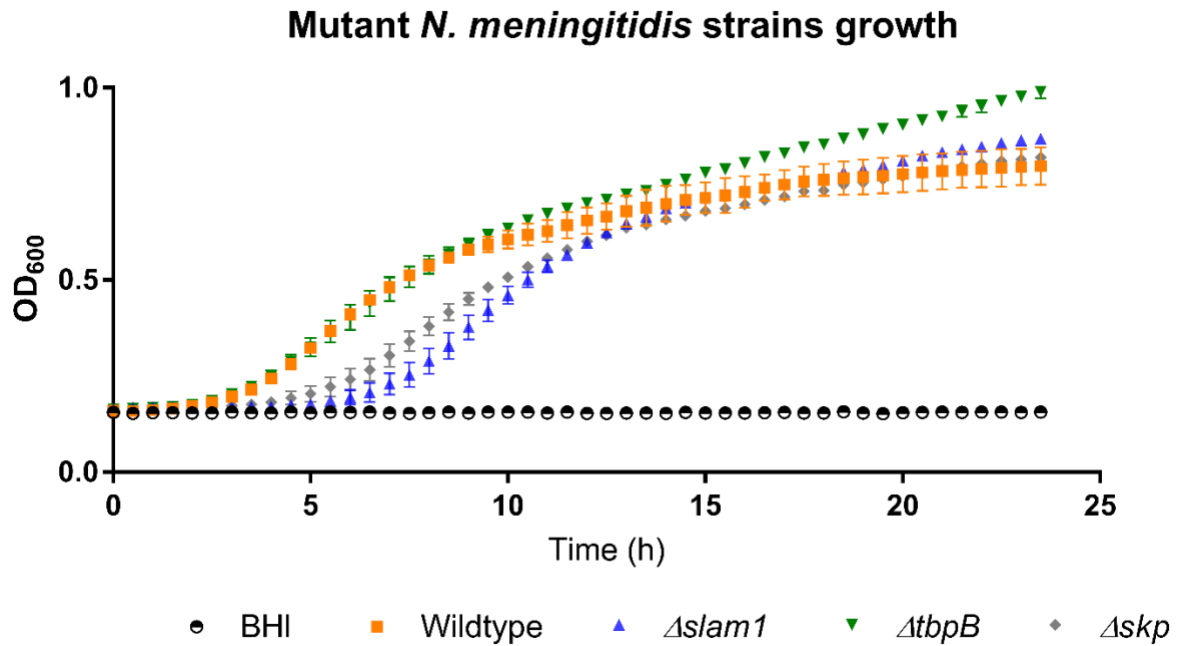

1032

1033 **Supplementary Fig. 10. Growth of B16B6 *N. meningitidis* strains in BHI media.**

1034 OD<sub>600</sub> was recorded every 30 minutes over 24 hours period.  $\Delta$ *skp* and  $\Delta$ *slam1* mutants

1035 were lagging behind but reached OD<sub>600</sub> of 0.7 eventually.

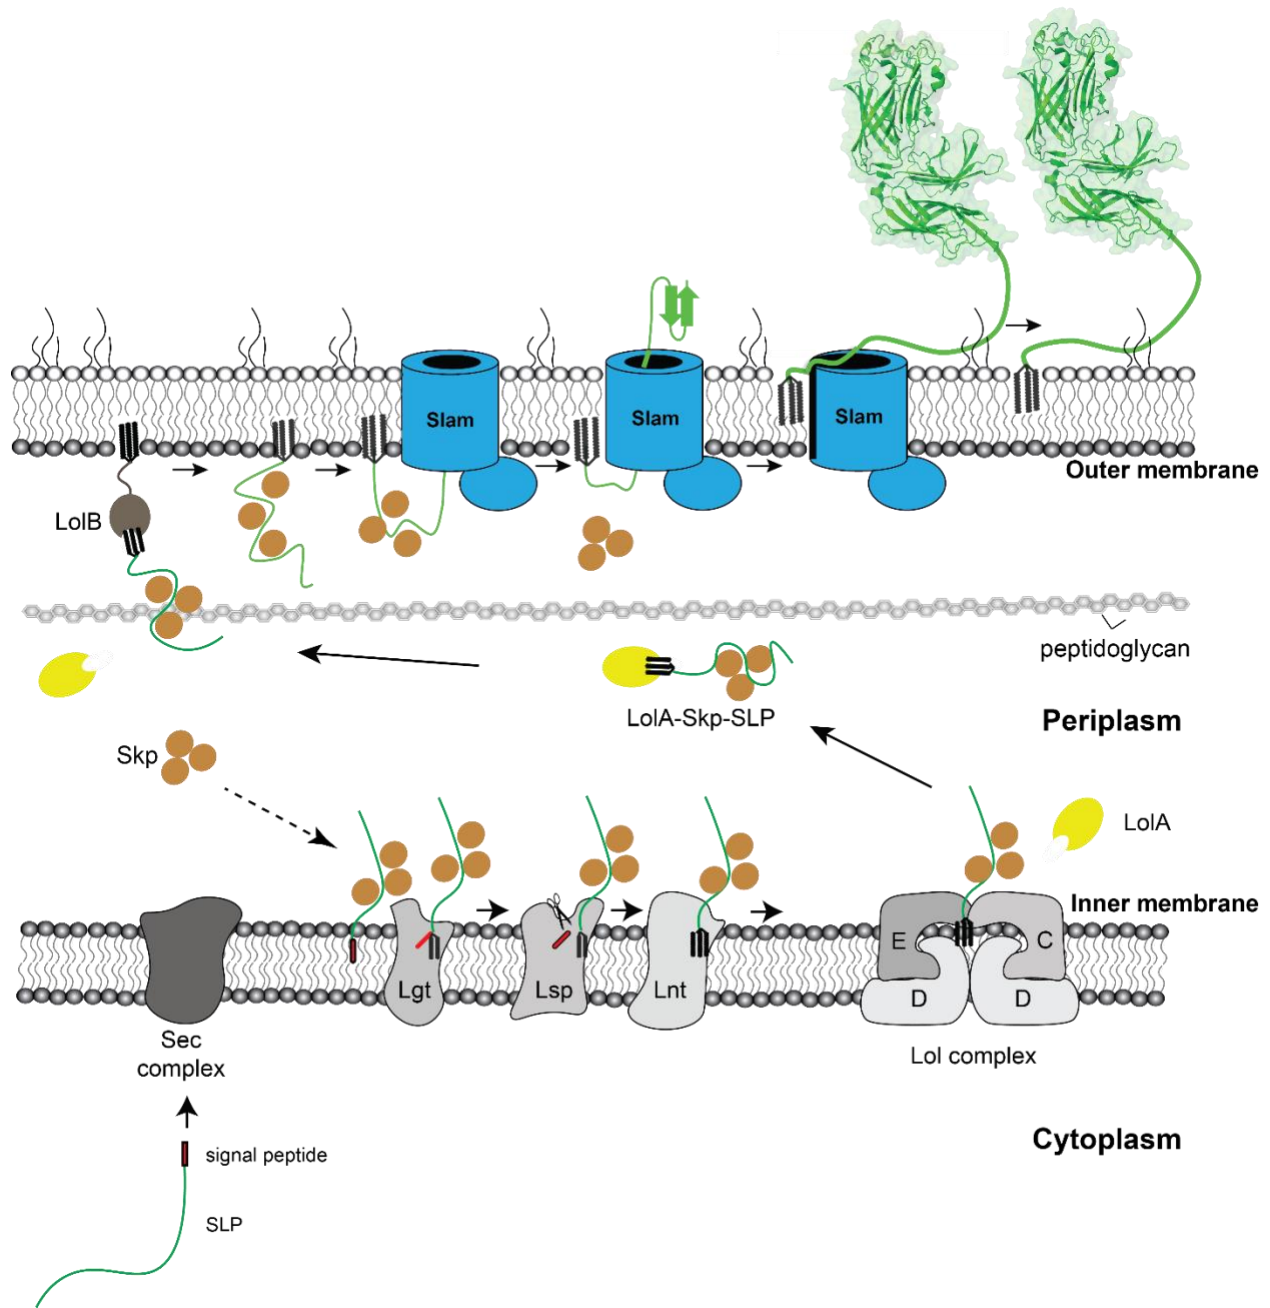

1036

1037 **Supplementary Fig. 11. Proposed model of localization for Slam-dependent**  
1038 **surface lipoproteins in Gram-negative bacteria.** Once the surface lipoproteins  
1039 emerged from the Sec complex, periplasmic chaperone Skp binds to the SLPs to  
1040 prevent early folding while their N-terminus is modified and lipidated before getting

1041 passed to the Lol complex. LolA then binds to the lipidated SLPs and releases the  
1042 proteins to the periplasm while Skp stays bound to prevent SLP folding. LolB in the OM  
1043 serves as the receiver for the LolA-SLP-Skp complex and then inserts the lipidated  
1044 SLP-Skp complex into the inner leaflet of the OM. The “specificity motif” present at the  
1045 C-terminus of the unfolded SLP is identified by Slam and then transported across the  
1046 outer membrane through the Slam channel and folds rapidly. The folding of SLP on the  
1047 other side triggers the release of chaperone Skp, allowing Slam to pull the rest of the  
1048 protein across the OM. Once the entire length of the SLP is transported, the Slam  
1049 lateral gate allows the lipid anchor to “flip” from the inner leaflet to the outer leaflet of the  
1050 outer membrane.

1051 **Supplementary Table S1: Strains, plasmids and antibodies used in this study.**

| Strain or plasmid                                  | Description                                                                                                                                        | Reference            |
|----------------------------------------------------|----------------------------------------------------------------------------------------------------------------------------------------------------|----------------------|
| <b>Strains:</b>                                    |                                                                                                                                                    |                      |
| <i>E. coli</i> MM294                               | F <sup>-</sup> , <i>glnX44</i> (AS), LAM <sup>-</sup> , <i>rbcC1</i> , <i>endA1</i> , <i>spoT1</i> , <i>thiE1</i> , <i>hsdR17</i> , <i>creC510</i> | Yale CGSC #6315      |
| <i>E. coli</i> C43 (DE3)                           | F <sup>-</sup> <i>ompT gal dcm hsdSB(rB- mB-)</i> (DE3)                                                                                            | (26)                 |
| <i>E. coli</i> BL21 Star (DE3)                     | F <sup>-</sup> <i>ompT gal dcm hsdSB(rB- mB-)gal dcm rne131</i> (DE3)                                                                              | Invitrogen, C6010-03 |
| <i>E. coli</i> K12                                 | F <sup>'</sup> proA+B+ <i>lacIq Δ(lacZ)M15 zzf::Tn10(TetR)/fhuA2 glnV Δ(lac-proAB) thi-1 Δ(hsdS-mcrB)5</i>                                         | (26)                 |
| <i>E. coli</i> K12 <i>skp</i> -                    | <i>E. coli</i> K12 devoid function of Skp                                                                                                          | (26)                 |
| <i>E. coli</i> K12 <i>degp</i> -                   | <i>E. coli</i> K12 devoid function of DegP                                                                                                         | (26)                 |
| <i>N. meningitidis</i> B16B6                       |                                                                                                                                                    | (1)                  |
| <i>N. meningitidis</i> B16B6 $\Delta$ <i>slam1</i> | $\Delta$ <i>slam1::kan</i>                                                                                                                         | (11)                 |
| <i>N. meningitidis</i> B16B6 $\Delta$ <i>tbpB</i>  | $\Delta$ <i>tbpB::kan</i>                                                                                                                          | (11)                 |
| <i>N. meningitidis</i> B16B6 $\Delta$ <i>skp</i>   | $\Delta$ <i>skp::kan</i>                                                                                                                           | This study           |
| <b>Plasmids:</b>                                   |                                                                                                                                                    |                      |
| pET26b                                             | <i>E. coli</i> expression vector used for C43 (DE3) strain                                                                                         | Addgene, 69862-3     |
| pET26 <i>Nme Slam1</i>                             | pET26 containing pelB signal peptide, 6xHis and mature <i>N. meningitidis</i> Slam1                                                                | (11)                 |
| pET26 <i>Mcat Slam1</i>                            | pET26 containing pelB signal peptide, 6xHis and mature <i>M. catarrhalis</i> Slam1                                                                 | This study           |
| pET26 <i>Nme Slam2</i>                             | pET26 containing pelB signal peptide, 6xHis and mature <i>N. meningitidis</i> Slam2                                                                | This study           |

|                             |                                                                                                                        |                  |
|-----------------------------|------------------------------------------------------------------------------------------------------------------------|------------------|
| pET26 <i>Ngo</i> Slam2      | pET26 containing pelB signal peptide, 6xHis and mature <i>N. gonorrhoeae</i> Slam2                                     | This study       |
| pET52b                      | Expression vector used for <i>E. coli</i> C43 (DE3) in this study                                                      | Novagen, 71554-3 |
| pET52 <i>Mcat</i> TbpB-flag | pET52b containing full-length <i>M. catarrhalis</i> TbpB with and a flag tag                                           | This study       |
| pET52 <i>Nme</i> HpuA       | pET52b containing full-length <i>N. meningitidis</i> HpuA                                                              | This study       |
| pET52 <i>Nme</i> HpuA-flag  | pET52b containing full length <i>N. meningitidis</i> HpuA and a flag tag                                               | This study       |
| pET28a                      | Expression vector used for BL21 (DE3) strain in this study                                                             | Novagen, 69864-3 |
| pET28 LolA                  | pET28a containing 6xHis tag and mature <i>E. coli</i> LolA                                                             | This study       |
| pET28 <i>E. coli</i> SurA   | pET28a containing 6xHis tag and mature <i>E. coli</i> SurA                                                             | This study       |
| pET28 <i>E. coli</i> Skp    | pET28a containing 6xHis tag and mature <i>E. coli</i> Skp                                                              | This study       |
| pET28 <i>E. coli</i> DegP   | pET28a containing 6xHis tag and mature <i>E. coli</i> DegP                                                             | This study       |
| pET28 <i>Nme</i> Skp        | pET28a containing 6xHis tag and mature <i>N. meningitidis</i> Skp                                                      | This study       |
| pJH114                      | pTRC99a containing <i>E. coli</i> BamA-E with an 8xHis tag on the C-terminus of BamE obtained from Dr. Harry Bernstein | (16)             |
| pGCC4                       | Expression vector used for <i>E. coli</i> K12 strain in this study                                                     | Addgene, 37058   |
| pGCC4 <i>Mcat</i> Slam1     | pGCC4 containing 6xHis tag and mature <i>M. catarrhalis</i> Slam1                                                      | This study       |

|                              |                                                                                                                                                |                         |
|------------------------------|------------------------------------------------------------------------------------------------------------------------------------------------|-------------------------|
| pHERD                        | Expression vector used for <i>E. coli</i> K12 strain in this study                                                                             | NovoPro, V005568        |
| pHERD Mcat TbpB-flag         | pHERD containing mature <i>M. catarrhalis</i> TbpB C-terminal flag-tag                                                                         | This study              |
| pUC19                        | Cloning vector for bacteria                                                                                                                    | Addgene, 50005          |
| pUC19 <i>skp</i> ± 500       | pUC19 containing <i>N. meningitidis</i> <i>skp</i> gene with 500bp DNA upstream and downstream of <i>skp</i>                                   | This study              |
| pUC19 Δ <i>skp::kan</i> ±500 | pUC19 containing <i>kan</i> gene with 500bp DNA upstream and downstream of <i>skp</i> ( <i>skp</i> gen is replaced/swapped by <i>kan</i> gene) | This study              |
| pGCC4 Nme Skp                | pGCC4 plasmid containing <i>skp</i> gene (with its endogenous signal peptide)                                                                  | This study              |
|                              |                                                                                                                                                |                         |
| <b>Antibodies:</b>           |                                                                                                                                                |                         |
| α -Flag                      | Rabbit polyclonal antibody for Flag (DYKDDDDK) epitope                                                                                         | Invitrogen, PA1-984B    |
| α -OmpA                      | Rabbit polyclonal antibodies were obtained from Dr. Jan Willem de Gier                                                                         | (43)                    |
| α-His                        | Mouse monoclonal antibody for detecting polyhistidine tag                                                                                      | Pierce, MA1213          |
| α-TbpB                       | Rabbit polyclonal antibodies against <i>N. meningitidis</i> B16B6 TbpB                                                                         | (11)                    |
| α-Skp ( <i>E. coli</i> )     | Mouse polyclonal antibody for detecting <i>E. coli</i> Skp                                                                                     | This study              |
| α-Skp ( <i>Nme</i> )         | Mouse polyclonal antibody for detecting <i>N. meningitidis</i> Skp                                                                             | This study              |
| HRP-rabbit IgG               | Goat anti-rabbit IgG antibody conjugated to horseradish peroxidase (HRP)                                                                       | Cell Signalling, #7074S |



|                   |                                                                         |                                     |
|-------------------|-------------------------------------------------------------------------|-------------------------------------|
| HRP-mouse IgG     | Goat anti-mouse IgG antibody conjugated to horseradish peroxidase (HRP) | Pierce, PI31430                     |
| Strep-HRP         | Streptavidin conjugated to horseradish peroxidase (HRP)                 | Thermo Scientific™, N100            |
| Strep-PE          | Streptavidin conjugated to phycoerythrin (PE)                           | Jackson&ImmunoResearch, 016-110-084 |
| Rabbit-PE         | Goat anti-rabbit IgG conjugated to phycoerythrin (PE)                   | Jackson&ImmunoResearch, 111-116-144 |
|                   |                                                                         |                                     |
| <b>Substrate:</b> |                                                                         |                                     |
| Bio-htf           | Biotinylated human transferrin                                          | Invitrogen™, T23363                 |
